# Supplementary material for: Effects of screentime on the health and well-being of children and adolescents: a systematic review of reviews
Source: PubMed Central journal article supplement — BMJ Open. 2019 Jan 3;9(1):e023191. doi: 10.1136/bmjopen-2018-023191 (PMC6326346; doi:10.1136/bmjopen-2018-023191), 2019-01-03
Supplement: bmjopen-2018-023191.draft_revisions.pdf [file bmjopen-2018-023191.draft_revisions.pdf]

# BMJ Open

BMJ Open is committed to open peer review. As part of this commitment we make the peer review history of every article we publish publicly available.

When an article is published we post the peer reviewers' comments and the authors' responses online. We also post the versions of the paper that were used during peer review. These are the versions that the peer review comments apply to.

The versions of the paper that follow are the versions that were submitted during the peer review process. They are not the versions of record or the final published versions. They should not be cited or distributed as the published version of this manuscript.

BMJ Open is an open access journal and the full, final, typeset and author-corrected version of record of the manuscript is available on our site with no access controls, subscription charges or pay-per-view fees (<http://bmjopen.bmj.com>).

If you have any questions on BMJ Open's open peer review process please email [editorial.bmjopen@bmj.com](mailto:editorial.bmjopen@bmj.com)

# BMJ Open

## The effects of screentime on the health and well-being of children and adolescents: a systematic review of reviews

|                               |                                                                                                                                                                                                       |
|-------------------------------|-------------------------------------------------------------------------------------------------------------------------------------------------------------------------------------------------------|
| Journal:                      | <i>BMJ Open</i>                                                                                                                                                                                       |
| Manuscript ID                 | bmjopen-2018-023191                                                                                                                                                                                   |
| Article Type:                 | Research                                                                                                                                                                                              |
| Date Submitted by the Author: | 25-Mar-2018                                                                                                                                                                                           |
| Complete List of Authors:     | Stiglic, Neza; UCL Institute of child health, Population, policy and practice research programme<br>Viner, Russell; UCL Institute of child health, Population, policy and practice research programme |
| Keywords:                     | screentime, chil health, obesity, MENTAL HEALTH                                                                                                                                                       |
|                               |                                                                                                                                                                                                       |

SCHOLARONE™  
Manuscripts

Review only

# The effects of screentime on the health and well-being of children and adolescents: a systematic review of reviews

## Authors

Neza Stiglic

Russell M. Viner

## Affiliation

Population, Policy and Practice Research Programme

UCL Institute of Child Health, 30 Guilford St. London WC1N 1EH, UK

## Correspondence

Prof. Russell Viner

UCL Institute of Child Health

30 Guilford St.

London WC1N 1EH, UK

[r.viner@ucl.ac.uk](mailto:r.viner@ucl.ac.uk)

Tel: 020 7242 9789

## Abstract

### Objectives

To systematically examine the evidence of harms and benefits relating to time spent on screens for children and young people's (CYP) health and wellbeing, to inform policy.

### Methods

Systematic review of reviews (RoR) undertaken to answer the question "What is the evidence for health and wellbeing effects of screentime in children and adolescents (CYP)?" Electronic databases were searched for systematic reviews in February 2018. Eligible reviews reported associations between time on screens (screentime; any type) and any health/wellbeing outcome in CYP. Quality of reviews was assessed and strength of evidence across reviews evaluated. Prospero registration: CRD42018089483

### Results

13 reviews were identified (1 high quality, 9 medium and 3 low quality ). 6 addressed body composition; 3 diet/energy intake; 7 mental health; 4 cardiovascular risk; 4 for fitness; 3 for sleep; 1 pain; 1 asthma. We found moderately-strong evidence for associations between screentime and greater obesity/adiposity and higher depressive symptoms; moderate evidence for an association between screentime and higher energy intake, less healthy diet quality and poorer quality of life. There was weak evidence for associations of screentime with behaviour problems, anxiety, hyperactivity and inattention, poorer self-esteem, poorer well-being and poorer psychosocial health, metabolic syndrome, poorer cardiorespiratory fitness, poorer cognitive development and lower educational attainments and poor sleep outcomes. There was no or insufficient evidence for an association of screentime with eating disorders or suicidal ideation, individual cardiovascular risk factors, asthma prevalence or pain. Evidence for threshold effects was weak. We found weak evidence that small amounts of daily screen use is not harmful and may have some benefits.

### Conclusions

Higher levels of screentime is associated with a variety of health harms for CYP, with evidence strongest for adiposity, unhealthy diet, depressive symptoms and quality of life. Evidence to guide policy on suggested safe CYP screentime exposure is very limited.

**Strengths and limitations of this study**

- Undertook a systematic review of reviews (RoR) in multiple electronic databases using a pre-specified methodology
- Included only studies that directly reported screentime separately from other sedentary behaviours
- Used assessment of review quality and weight of supportive evidence to assign strength of evidence to findings
- Quality of included reviews was predominantly moderate or low, dominated by studies of television screentime, with screentime largely self-reported
- Data on mobile screen use was extremely limited and our review did not address the content or context of screen viewing

## Introduction

The screen, whether it is computer, mobile, tablet or television, is a symbol of our modern age. For our children, the 'digital natives' who have grown up surrounded by digital information and entertainment on screens, time on screens (screentime) is a major part of contemporary life.

However there have been growing concerns about the impact of screens on children and young people's (CYP) health. There is evidence that screentime is associated with obesity, with suggested mechanisms an increase in energy intake,<sup>1</sup> the displacement of time available for physical activity,<sup>2</sup> or more directly through reduction in metabolic rate.<sup>3</sup> There is also evidence that high screen-time is associated with deleterious effects on irritability, low mood and cognitive and socio-emotional development, leading to poor educational performance.<sup>4</sup>

Because of these concerns, expert groups have suggested controlling screen-time for children. In 2016 American Academy of Paediatrics (AAP) recommended limiting screen-time for 2-5 year olds to 1 hour per day of high-quality programs and for parents to limit screen-time in agreement with CYP 6 years and older.<sup>5</sup>

However the evidence for an impact of screen-time on health is inconsistent, with systematic reviews showing inconsistent findings.<sup>6-9</sup> This may in part be due to failure to separate screentime from non-screen sedentary behaviours characterised by low physical movement and energy expenditure. It may also be due to a failure to separate the sedentary elements of screentime from the content watched on screens. Others have argued that screen-based digital media have potential significant health, social and cognitive benefits and that harms are over-stated. A prominent group of scientists recently argued that messages that screens are inherently harmful "is simply not supported by solid research and evidence".<sup>10</sup>

Our aim was to inform policy relating to recommendations for screentime exposure in CYP by systematic examination of the evidence for harms and benefits for CYP health and wellbeing relating specifically to time spent using screens. Systematic reviews of reviews (RoR) are particularly suited to collating the strength evidence to guide policy. We therefore undertook an RoR of the effects of screentime of any type on CYP health and wellbeing outcomes.

## Methods

We undertook a systematic review of published systematic reviews, reporting Methods and Findings using the PRISMA checklist.<sup>11</sup> The review was registered with the Prospero registry of systematic reviews (registration number CRD42018089483).

### Review question

Our review question was "What is the evidence for health and wellbeing effects of screentime in children and adolescents?"

### Search strategy

We searched electronic databases (Medline, EMBASE, PsycInfo and Cinahl) in February 2018. We used the search terms in Medline as follows: '(child OR teenager OR adolescent OR youth) AND (screen time OR television OR computer OR sedentary behaviour OR sedentary activity) AND health', with publication type limited to 'systematic review, with or without meta-analysis'. Similar search terms were used in the other databases. We did not limit studies by date or language. Identified relevant reviews were hand-searched for additional likely references.

### Eligibility criteria

We only included systematic reviews which fulfilled the following eligibility criteria:

- i. Systematically searched and reviewed the literature using prespecified protocols
- ii. examined children or adolescents from 0 – 18 years. Studies with a wider age range which provided data on children/adolescents separately were eligible.
- iii. assessed and reported screentime i.e. time spent on screens of any type, including self-report or measured/observed measures.
- iv. examined health and well-being impacts on children or adolescents

We excluded reviews in which screen-time was not defined adequately or where time on screens was not separated from other forms of sedentary behaviour, e.g. sitting while talking/homework/reading, time spent in a car etc. Where reviews examined overall sedentary behaviour but reported findings for screen-time separately to other forms of sedentary behaviour, these were included. However reviews that did not separate screentime from other sedentary behaviour were not included. Where authors updated a review which included all previous studies, we only included the later review to avoid duplication.

### Study selection

A flowchart of study identification and selection is shown in Figure 1. Titles and abstracts were reviewed and potentially eligible articles identified after removal of duplicates. The abstracts of 389 articles were reviewed and 161 potentially eligible articles were identified which appeared to meet the eligibility criteria. After review of full text to determine final eligibility, 13 reviews are included in this review. Characteristics of the included reviews are shown in Table 1.

### Data extraction

Descriptive findings and results of any quantitative meta-analyses were extracted to a spreadsheet by NS and checked for accuracy by RV.

### Evaluation of quality

The quality of systematic review was assessed using the adapted version of Assessing the Methodological Quality of Systematic Reviews (AMSTAR).<sup>12</sup> We characterised reviews as high, medium or low quality. High-quality reviews were required to have the following: provided a priori published designs (for example published protocols or had ethics committee approval); searched at least two bibliographic databases plus conducted another mode of searching; searched for reports regardless of publication type; listed and described included studies; used at least two people for data extraction; documented the size and quality of included studies and used this to inform their syntheses; synthesised study findings narratively or statistically; assessed the likelihood of publication bias; and included a conflict of interest statement. Medium-quality reviews were required to have: searched at least one database; listed and described included studies; documented the quality of the included studies; and synthesised study findings narratively or statistically. Reviews did not meet these criteria were defined as low quality. Note we did not seek to assess the quality of primary studies included in each review.

### Data synthesis and summary measures

Synthesis began by summarising review results and conclusions in note form. Reviews were then grouped by health domain: body composition (including adiposity); diet and energy intake; mental health and wellbeing; cardiovascular risk; fitness; cognition, development and educational attainments; sleep; pain and asthma. We assessed whether the conclusions of review-level evidence appeared reasonable, for example considering effect sizes and designs. We noted meta-analyses undertaken in reviews separately to narrative findings, but made no attempt to further quantitatively summarise findings across reviews. We noted dose-response findings where relevant.

We then summarized findings across each domain according to the overall strength of evidence. In this we aimed to minimise 'vote-counting' (quantifying the number of studies reporting positive and negative findings regardless of their size and quality) by weighing findings according to the size and quality of reviews and design of primary studies.<sup>13</sup> In summarizing across reviews, we defined strong evidence as consistent evidence of an association reported by high quality reviews, moderately-strong evidence as consistent evidence across multiple medium quality reviews, moderate evidence as largely consistent evidence across medium quality reviews and weak evidence as representing some evidence from medium quality reviews or more consistent evidence from poor quality reviews.<sup>12</sup>

### Patient involvement

Patients or the public were not involved in the conceptualisation or carrying out of this research.



## Results

Characteristics of the 13 included reviews are shown in Table 1 with quality assessments for included reviews shown in Table 2. The proportion of studies in each review that were also included in other reviews ranged from 0-22% (Table 1). Table 3 shows the mapping of reviews to outcome areas by quality category. The objectives of many of the included reviews overlapped and many reviews considered multiple outcomes. There were six reviews which considered the associations of screentime with body composition measures (including obesity), 3 for diet and energy intake, 7 for mental health related outcomes including self-esteem and quality of life, 4 for cardiovascular risk, 4 for fitness, 3 for sleep and 1 each for pain and asthma. The only high quality review was limited to cardiovascular risk. We describe findings by domain below.

### Body composition

Consistent evidence for an association between screentime and greater adiposity was reported in 5 medium quality reviews and 1 low quality review.

### Overall screentime

In medium quality reviews, Costigan et al.<sup>6</sup> reported that 32/33 studies, including 7/8 studies with low risk of bias, identified a strong positive association of screentime with weight status; van Ekris et al.<sup>9</sup> reported strong evidence for relationship between screentime and BMI or BMI z-score based upon 2 HQ studies and moderate evidence for relationship with overweight/obesity in 3 LQ studies; and Carson et al.<sup>14</sup> reported a strong association between screentime and unfavourable body composition (obesity or higher BMI or fat mass) in 11/13 longitudinal studies, 4/4 case-control studies and 26/36 cross-sectional studies.

In a low quality review, Duch et al.<sup>7</sup> reported a positive association between screentime and BMI in 4/4 studies.

### Television screentime

The great majority of findings related to television screentime. Tremblay et al.<sup>8</sup> reported a moderate association between television screentime and adiposity measures, identified in 94/119 cross-sectional studies and 19/28 longitudinal studies. Van Ekris et al. reported strong evidence for a positive relationship between TV viewing time and incidence of overweight/obesity over time in 3 high quality studies and in 3 low quality studies. Carson et al. reported that unfavourable adiposity was associated with television screentime in 14/16 longitudinal studies, 2/2 case-control studies and 58/71 cross-sectional studies. Le Blanc et al.<sup>15</sup> reported that the association between television screentime and unfavourable adiposity measures could be seen at all ages, but that evidence quality was low for infants and moderate for toddlers and pre-schoolers.

Two reviews reported meta-analyses relating to television screentime. Van Ekris et al. reported that across 24,257 participants from 9 prospective cohorts, BMI at follow-up was not significantly associated with each additional hour of daily TV viewing ( $\beta = 0.01$ , 95%CI = [-0.002; 0.02]), with high heterogeneity across studies. Adjustment for physical activity or diet did not materially change findings. In contrast, Tremblay et al. reported that across 4 RCTs, decreased television screentime post-intervention was associated with a pooled decrease in BMI of -0.89kg/m<sup>2</sup> (95% CI of -1.467 to -0.11,  $p = 0.01$ ).

### *Computer, video, mobile or other screentime*

Data on other forms of screentime were very sparse. In medium quality reviews, Carson et al. reported that unfavourable adiposity measures were associated with computer screentime in 3/4 studies but in 0/2 case-control studies and that findings in cross-sectional studies were highly inconsistent; Carson et al. identified no evidence for an association between video/videogame screentime and adiposity; and van Ekris et al. identified no evidence for relationship between computer /computer game screentime with BMI or BMI z score in 10 LQ studies or with WC or WC z-score in 2 LQ studies.

In the only meta-analysis, van Ekris et al. reported that across 6971 participants from 5 prospective cohorts, BMI at follow-up was not significantly associated with each additional hour of daily computer screentime ( $\beta = 0.00$ , 95%CI = [-0.004; 0.01]), with high heterogeneity across studies. Adjustment for physical activity or diet did not change findings materially.

### *Dose-response effects*

A dose-response effect for television screentime was reported by 2 medium quality reviews (Tremblay et al.; Le Blanc et al.) with a third (Carson et al.) not distinguishing between television or other screentime. Carson et al. reported that screentime dose-response was examined in 73 studies: higher screen time/TV viewing was significantly associated with unfavourable body composition with a 1-h cut-point (8/11 studies), 1.5-h cut-point (2/2 studies), 2-h cutpoint (24/34 studies), 3-h cut-point (12/13 studies), or 4-h cut-point (4/4 studies).

### *Summary*

We conclude there is moderately-strong evidence that higher television screentime is associated with greater adiposity, but that there is insufficient evidence for an association with overall screentime or non-television screentime. There is moderate evidence that a dose-response association is present for screentime or television screentime. However there is no strong evidence for a particular threshold in hours of screentime.

### *Diet and energy intake*

Associations of screentime with energy intake and/or diet factors were examined in 2 medium and 1 low quality review.

In a medium quality review of experimental studies, Marsh et al.<sup>1</sup> reported that there was strong evidence that i) screentime in the absence of food advertising was associated with increased dietary intake compared with non-screen behaviour; ii) television screentime increases intake of very palatable energy-dense foods; and that there was weak evidence for video game screentime similarly increased dietary intake. They concluded there was moderate evidence that stimulatory effects of TV on intake were stronger in overweight or obese children than those of normal weight, suggesting the former are more susceptible to environmental cues.

In a medium quality review, Costigan et al. reported a negative association of screentime with healthy dietary behaviour in 3/5 studies. In a low quality review, Pearson and Biddle<sup>16</sup> reported moderate evidence that television screentime was positively associated with total energy intake and energy dense drinks and negatively associated with fruit and vegetable consumption in longitudinal studies in both children and adolescents. In cross-sectional studies they identified moderate

evidence for the same associations for television screentime in children and for overall screentime in adolescents.

### *Summary*

We conclude there is moderate evidence for an association between screentime, particularly television screentime, and higher energy intake and less healthy diet quality including higher intake of energy and lower intake of healthy food groups.

### *Mental health and wellbeing*

Associations between mental health and well-being and screentime were examined in 7 medium quality reviews.

#### *Anxiety, depression and internalising problems*

Only Hoare et al.<sup>17</sup> reported on associations with anxiety, and found moderate evidence for a positive association between screentime duration and severity of anxiety symptoms.

Costigan et al. reported a positive association of screentime with depressive symptoms in 3/3 studies. Similarly Hoare et al. reported strong evidence for a positive relationship between depressive symptomatology and screentime based on mix cross sectional and longitudinal studies. Hoare et al also noted there was limited evidence for association between social media screentime and depressive symptoms. Suchert et al.<sup>18</sup> reported a positive association of screentime with internalizing problems (in 6/10 studies) but noted a lack of clear evidence for depressive and anxiety symptoms when measured separately.

In terms of dose response for depressive symptoms, Hoare et al reported that higher depressive symptoms were associated with  $\geq 2$  hours of screentime daily in 3/3 studies. Suchert et al. reported that 3 studies identified a curvilinear association between screentime and depressive symptoms, such that adolescents using screens in a moderate way showed the lowest prevalence of depressive symptoms.

#### *Behaviour problems*

Carson et al. reported that an association between screentime and behavioural problems was examined in 24 studies. In longitudinal studies, a positive association with unfavourable behavioural measures was reported in 2/2 studies for total screentime and 3/5 studies for television screentime, but a null association was reported in 3/3 studies of video game screentime. In cross-sectional studies, positive associations were reported for television screentime (4/6 studies), computer use (3/5 studies) and video game screentime (3/4 studies). In contrast, Tremblay et al concluded there was poor evidence that television screentime was associated with greater levels of behaviour problems.

In terms of dose response, Carson et al. reported that this was examined in 2 studies, which both reported that television screentime  $>1$ hour daily was associated with unfavourable measures of behaviour.

#### *Hyperactivity and inattention*

Hyperactivity and attention were only considered in 1 review. Suchert et al. reported that there was a positive association between screentime and hyperactivity/inattention problems in 10/11 studies.

### *Other mental health problems*

Le Blanc et al. reported that there was moderate evidence that television screentime was associated with poorer psychosocial health in young children 1-4 years old.

Only one review each considered the association of screentime with eating disorders and suicidal ideation. Suchert et al. reported there was no clear evidence for an association with eating disorder symptoms, whilst Hoare et al. reported there was no clear evidence for a relationship with suicidal ideation.

### *Self-esteem*

Effects on self-esteem were considered in 3 reviews. Hoare et al. concluded there was moderate evidence for a relationship between low self-esteem and screentime. Carson et al. reported that this association was not considered in longitudinal studies but that in cross-sectional studies, lower self-esteem was associated with screentime in 2/2 studies and with computer screentime in 3/5 studies, and no clear evidence for mobile-phone screentime.

In contrast, Suchert et al. reported no clear evidence for an association with self-esteem and Tremblay et al. similarly reported unclear evidence, with only 7/14 cross-sectional studies showing an inverse relationship between screentime and self-esteem.

### *Quality of life and well-being*

Quality of life was considered in 1 review of Health-related quality of life (HRQOL) and in 2 reviews which reported on perceived quality of life or perceived health.

HRQOL as a formal measured construct was examined by Wu et al.<sup>19</sup> who reported consistent evidence that greater screentime was associated with lower measured HRQOL in 11/13 cross-sectional and 4/4 longitudinal studies. A meta-analysis of 2 studies found that  $\geq 2$  to 2.5hrs per day of screentime was associated with significantly lower HRQOL (pooled mean difference in HRQOL score 2.71 (1.59, 3.38) points) than those with  $< 2$ -2.5hrs per day.

Suchert et al. reported that there was a positive association between screentime and poorer psychological well-being or perceived quality of life in 11/15 studies. Costigan et al. reported a negative association between screentime and perceived health in 4/4 studies.

### *Adjustment for physical activity*

Suchert et al. reported that 11 included studies examined the association between screentime and mental health adjusted for physical activity. They reported that in each study the association between screentime and poorer mental health (a range of outcomes) was robust to adjustment for physical activity, suggesting that screentime is a risk factor for poor mental health independently of displacement of physical activity.

### *Summary*

There is moderately strong evidence for an association between screentime and depressive symptoms. This association is for overall screentime but there is very limited evidence from only one review for an association with social media screentime. There is moderate evidence for a dose-response effect, with weak evidence for a threshold of  $\geq 2$  hours daily screentime for the association with depressive symptoms.

1  
2  
3 There is moderate evidence for an association of screentime with lower HRQOL, with weak evidence  
4 for a threshold of  $\geq 2$  hours daily screentime.

5  
6 There is weak evidence for association of screentime with behaviour problems, anxiety,  
7 hyperactivity and inattention, poorer self-esteem and poorer psychosocial health in young children.  
8 There is no clear evidence for an association with eating disorders or suicidal ideation. There is weak  
9 evidence that the association between screentime and mental health is independent of the  
10 displacement of physical activity.  
11  
12

### 13 Cardiovascular risk

14  
15 Associations between screentime and cardiovascular risk were examined by 1 high quality and 3  
16 medium quality reviews.

#### 17 *Metabolic syndrome / clusters of cardiovascular risk factors*

18  
19  
20 In the only high quality review, Goncalves de Oliveira and Pinto Guedes<sup>20</sup> reported there was null  
21 evidence for the association of screentime or television screentime with the presence of the  
22 metabolic syndrome (MetS). In meta-analysis across 6 studies (n=3881), they did not identify a  
23 significant relationship, with the odds ratio (OR) for >2hrs screentime = 1.20 (CI 95%, 0.91 to 1.59) p  
24 = 0.20; I<sup>2</sup> = 37%). However when weekend screentime was examined separately in 2 studies  
25 (n=1620), they found a significant association with presence of the MetS (OR = 2.05 (CI 95%, 1.13 to  
26 3.73) p = 0.02; I<sup>2</sup> = 0%). In a medium quality review, Carson et al. reported that an association  
27 between a clustered risk factor score and television screentime was reported in 2/2 longitudinal  
28 studies and 6/10 cross-sectional studies.  
29  
30

#### 31 *Individual cardiovascular risk factors*

32  
33 Three medium quality reviews examined the evidence for an association between screentime  
34 various individual risk factors, e.g. cholesterol, blood pressure, HbA<sub>1c</sub> or insulin insensitivity.  
35 Tremblay et al, van Ekris et al and Carson et al. each reported there was no consistent evidence for  
36 an association with any risk factor, with evidence largely limited to single studies and not consistent  
37 across studies.  
38

#### 39 *Summary*

40  
41 There is weak evidence of an association between screentime and television screentime with the  
42 metabolic syndrome. There is no clear evidence for an association with any individual cardiovascular  
43 risk factor.  
44  
45

### 46 Fitness

47  
48 Associations with fitness were examined by 4 medium quality reviews. Two reviews, Costigan et al.  
49 and Tremblay et al., noted that evidence for an association between screentime and fitness was  
50 weak and inconsistent. Indeed, Costigan et al. noted that 2/5 studies reported a positive  
51 relationship, i.e. that higher screentime was associated with higher physical activity.  
52

53  
54 In contrast, 2 reviews (Carson et al, and van Ekris et al.) concluded there was strong evidence for an  
55 inverse association between screentime or television screentime and cardiorespiratory fitness.  
56  
57  
58  
59

1  
2  
3 Carson et al. noted that 4/4 studies examined a threshold and found that higher screentime was  
4 significantly associated with lower fitness when a 2-h cut-point was used (4/4 studies).

5  
6 *Summary*

7  
8 There is weak and inconsistent evidence for an association between screentime or television  
9 screentime and cardiorespiratory fitness, with weak evidence for a 2 hour daily screentime  
10 threshold.

11  
12  
13 Cognition, development and attainments

14  
15 Associations with CYP cognition and development were examined in 3 medium quality reviews.

16  
17 Le Blanc et al. reported that there was low quality evidence that television screentime had a  
18 negative impact on cognitive development in young children. Evidence was stronger amongst  
19 infants, where Le Blanc et al. concluded that there was moderate-quality evidence that television  
20 screentime elicited no benefits and was harmful to cognitive development.

21  
22 Tremblay et al. reported there was poor evidence that greater television screentime was associated  
23 with poorer educational attainments. Carson et al. also noted weak evidence that screentime or  
24 television screentime were associated with poorer attainments.

25  
26 *Summary*

27  
28 There is weak evidence that screentime particularly television screentime is associated with poorer  
29 educational attainments and has a negative effect on cognitive development in younger children.

30  
31  
32 Sleep

33  
34 Associations with sleep were examined in 1 medium and 2 low quality reviews.

35  
36 In a medium quality review, Costigan et al. reported a positive association between screentime and  
37 sleep problems in 2/2 studies. In low quality reviews, Duch et al. reported there was inconclusive  
38 evidence for an association between screentime and sleep duration. In contrast, Hale and Guan<sup>21</sup>  
39 reported there was moderate evidence that overall screentime, television screentime, computer  
40 screentime, video screentime and mobile phone screentime were associated with poor sleep  
41 outcomes including delayed bedtimes, shortened total sleeptime, sleep-onset-latency and daytime  
42 tiredness. They estimated that there was approximately 5-10 minute sleep bedtime delay with each  
43 additional hour of television screentime. Findings of significantly shorter total sleep time with  
44 greater mobile device screentime were reported in 10/12 studies, with 5/5 reporting greater  
45 subjective day-time tiredness or sleepiness.

46  
47  
48 *Summary*

49  
50 There is weak evidence that screentime is associated with poor sleep outcomes including delay in  
51 sleep onset, reduced total sleep time and daytime tiredness. There is evidence from 1 review that  
52 this association is seen across all forms of screentime including television screentime, computer  
53 screentime, video screentime and mobile phone screentime.

### Pain

Associations with pain were examined in 1 medium quality review. Costigan et al. reported that there was weak evidence for an association between screentime and neck/shoulder pain, headache and lower back pain although this was examined in very few studies. As this was examined in only one review we characterised the level of evidence as insufficient.

### Asthma

Associations with asthma were examined in 1 medium quality review. Van Ekris et al reported there was insufficient evidence for a relationship between screentime or television screentime and asthma prevalence.

## Discussion

This RoR summarizes the published literature on the effects of screentime on CYP health and wellbeing. Evidence was strongest for adiposity and diet outcomes, with moderately-strong evidence that higher television screentime was associated with greater obesity/adiposity and moderate evidence for an association between screentime, particularly television screentime, and higher energy intake and less healthy diet quality. Mental health and well-being were also the subject of a number of reviews. There was moderately-strong evidence for an association between screentime and depressive symptoms, although evidence for social media screentime and depression was weak. Evidence that screentime was associated with poorer quality of life was moderate, however evidence for an association of screentime with other outcomes was weak, including for behaviour problems, anxiety, hyperactivity and inattention, poorer self-esteem, poorer well-being and poorer psychosocial health in young children. Weak evidence suggested that mental health associations appeared to be independent of physical activity.

Evidence for other outcomes was notably less strong. There is weak evidence of an association between screentime and television screentime with the metabolic syndrome, poorer cardiorespiratory fitness, poorer cognitive development and lower educational attainments and poor sleep outcomes. In contrast, there was no or insufficient evidence for an association of screentime with eating disorders or suicidal ideation, any individual cardiovascular risk factor, asthma prevalence or pain. We identified no consistent evidence of benefits for health, well-being or development, although we acknowledge that screentime may be associated with benefits in other domains not assessed here.

Evidence for a dose-response relationship between screentime and health outcomes is generally weak. We found moderate evidence for a dose-response association for screentime or television screentime and adiposity outcomes, depression and HRQOL. However we identified no strong evidence for a threshold in hours of screentime for adiposity and only weak evidence for a threshold of  $\geq 2$  hours daily screentime for the associations with depressive symptoms and with HRQOL. One review suggested there was a curvilinear relationship between screentime and depressive symptoms.<sup>18</sup>



1  
2  
3 Overall the quality of included reviews was moderate, with only one high quality review and three  
4 low quality reviews included. There were only 4 meta-analyses identified, two of television  
5 screentime and BMI and one each of screentime and the metabolic syndrome and screentime and  
6 HRQOL. Almost all studies in each review were undertaken in high-income countries, the majority in  
7 each review undertaken in the USA. Overlap in included studies between reviews was generally low,  
8 suggesting that findings were not dominated by small numbers of individual studies.  
9

10 A major weakness in the literature is its domination by television screentime, with smaller numbers  
11 of studies examining computer use or gaming and very few studies including mobile screen devices.  
12 None examined multiple concurrent screen use, although there is increasing evidence that CYP may  
13 combine screen-use such as using smartphones whilst watching television; young people report  
14 using multiple screens to facilitate filtering out of unwanted content, including advertisements.<sup>22</sup>  
15 Thus it is unclear to what extent these findings can be generalised to more modern forms of screen  
16 use including social media and mobile screen use.  
17  
18

19 A central issue in whether these findings are generalizable to other forms of screentime is the  
20 degree to which the effects of screentime relate to time spent on screen or content watched on  
21 screen. Screentime may act through use whilst sedentary (i.e. displacing physical activity) or through  
22 more direct effects. These direct effects may be either through the content watched on screens (e.g.  
23 desensitizing children to violence or sexually explicit material; or exposure to bullying), through the  
24 displacement of socialisation or learning time (e.g. leading to social isolation) or through more direct  
25 cognitive effects, e.g. the impact of blue screen light on sleep patterns and impacts upon attention  
26 and concentration.<sup>4</sup> Our findings tell us little about the mechanisms by which screentime affects  
27 health, and it is plausible that the effects we identified on adiposity, fitness, cardiovascular risk,  
28 mental health and sleep are due to the sedentary effects of screen use. However we did identify  
29 moderate evidence that screentime was associated with higher intake of energy dense foods, which  
30 unlikely to be mediated by sedentariness. Further, there is weak evidence that associations of  
31 screentime with mental health outcomes are robust to adjustment for physical activity,<sup>18</sup> suggesting  
32 that screentime may affect mental health independently of the displacement of physical activity.  
33  
34

35 We found no convincing evidence of health benefits from screentime. Yet some argue strongly that  
36 digital media have potential significant health, social and cognitive benefits and that harms are over-  
37 stated. A prominent group of scientists recently argued that messages that screens are inherently  
38 harmful "is simply not supported by solid research and evidence. Furthermore, the concept of  
39 "screen time" itself is simplistic and arguably meaningless, and the focus on the amount of screen  
40 use is unhelpful."<sup>10</sup> They pointed out that research has focused upon counting the quantity of  
41 screentime rather than investigating the contexts of screen use and content watched. Our review  
42 addressed quantity of screentime and did not investigate the impacts of contexts or content on  
43 health outcomes. However findings of a curvilinear relationship between screentime and depressive  
44 symptoms in one of our reviews<sup>18</sup> and the description of a similar relationship for adolescent  
45 wellbeing<sup>23</sup> suggests that moderate use of digital technology might be important for social  
46 integration for adolescents in modern societies.  
47  
48  
49  
50

## 51 Limitations

52  
53 Our review is subject to a number of limitations. Quality of included reviews was largely moderate or  
54 low, with only one high quality review. Key factors for reviews not being classified as high quality  
55 were failing to assess the quality and likelihood of publication bias within included primary studies or  
56  
57  
58  
59



1  
2  
3 failing specify an a priori design. The included reviews were not entirely independent, although the  
4 overlap in primary studies was low or very low for most, thus it is unlikely that our findings are  
5 biased by individual studies included in multiple reviews. RoR are a methodology that is being  
6 developed and there is no agreed best practice; such reviews are only as good as the reviews  
7 included and the primary studies that are included within them.<sup>24</sup> There were limitations regarding  
8 the reviews included in our study in terms of heterogeneity between reviews in definition of  
9 screentime exposures, definition of health outcomes and measurement tools, making comparisons  
10 difficult. Screentime was largely measured by self-report although increasing numbers of studies  
11 over time used more objective measures of screentime. Reviews also largely failed to consider the  
12 processes by which screentime impacted upon health outcomes. In our narrative synthesis of  
13 findings, we aimed to avoid 'vote-counting' of numbers of positive or negative studies to judge  
14 strength of evidence. However it is possible that our findings reflect methodological or conceptual  
15 biases in our included reviews. A limitation of reviews or reviews including our own is the necessary  
16 time lag for inclusion of primary studies in systematic reviews, meaning that they may not represent  
17 the most contemporary research. Data on mobile screen use was particularly limited in our included  
18 reviews.  
19  
20  
21

## 22 Conclusions

23  
24 There is considerable evidence that higher levels of screentime is associated with a variety of health  
25 harms for CYP, with evidence strongest for adiposity, unhealthy diet, depressive symptoms and  
26 quality of life. Evidence for impact upon other health outcomes is largely weak or absent. We found  
27 no consistent evidence of health benefits from screentime. Whilst evidence for a threshold to guide  
28 policy on CYP screentime exposure was very limited, there is weak evidence that small amounts of  
29 daily screen use is not harmful and may have some benefits.  
30  
31

32 Given the rapid increase in screen use by CYP internationally over the past decade, particularly for  
33 new content areas such as social media, further research is urgently needed to understand the  
34 impact of the contexts and content of screen use on CYP health and well-being, particularly in  
35 relationship to mobile digital devices.  
36  
37  
38  
39  
40  
41  
42  
43  
44  
45  
46  
47  
48  
49  
50  
51  
52  
53  
54  
55  
56  
57  
58  
59  
60

### **Funding**

This research received no specific grant from any funding agency in the public, commercial or not-for-profit sectors.

### **Competing interests**

All authors declare they have no competing interests. Russell Viner is President of the Royal College of Paediatrics & Child Health.

### **Author contributions**

RV conceptualised the study, planned the methods, assisted with the extraction of data and analysis of findings led writing the paper. NS undertook the initial search and led the extraction of data and contributed to analysis of findings and writing the paper.

Figure 1. Flowchart for review

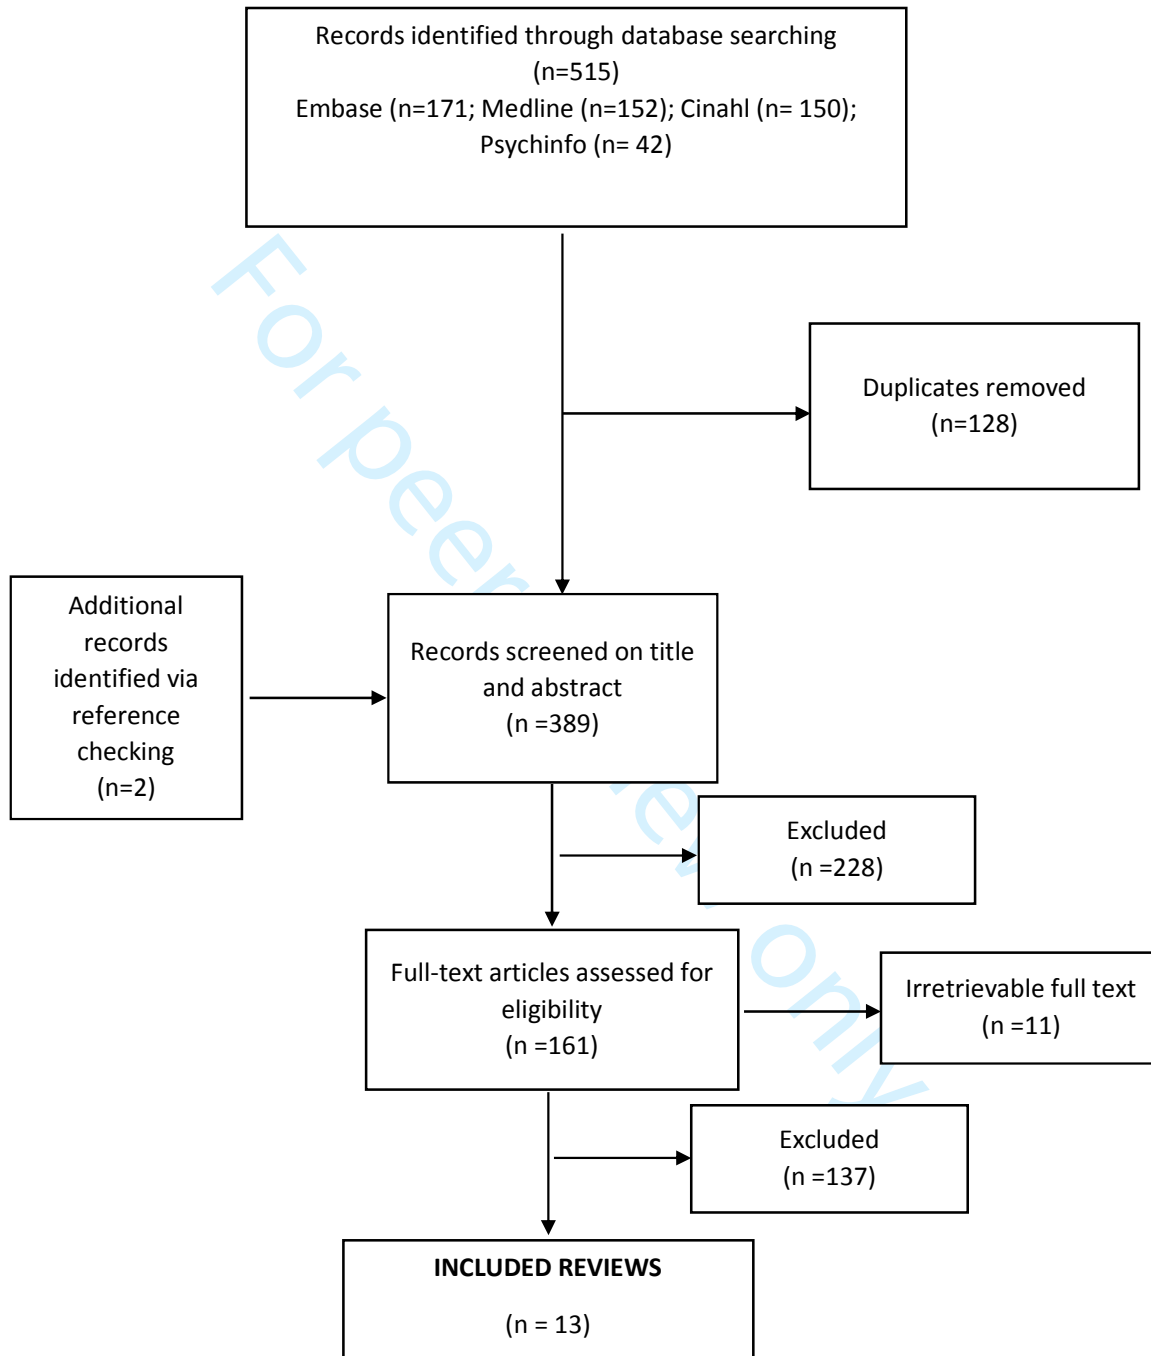

Table 1. Characteristics of included studies

| Author                    | Age                  | Outcome measures                                                                                                                                                   | Meta-analysis | Studies (n, CS, LS, RCT, N of subjects)                                               | % duplicate studies | Narrative findings                                                                                                                                                                                                                                                                                                                                                                                                              | Findings of meta-analysis                                                                                                                                                                |
|---------------------------|----------------------|--------------------------------------------------------------------------------------------------------------------------------------------------------------------|---------------|---------------------------------------------------------------------------------------|---------------------|---------------------------------------------------------------------------------------------------------------------------------------------------------------------------------------------------------------------------------------------------------------------------------------------------------------------------------------------------------------------------------------------------------------------------------|------------------------------------------------------------------------------------------------------------------------------------------------------------------------------------------|
| Pearson and Biddle (2011) | C< 11y;<br>A: 12–18y | Dietary intake; assessed largely through food frequency questionnaires.                                                                                            | No            | n=53; 19 in C and 26 in Ad; largely CS; 5 LS in C & 5 LS in Ad. Total N not reported. | 14.6%               | C (<12yrs): TVST - assoc. with fruit, vegetable consumption; + assoc. with energy-dense snack consumption, fast food consumption, energy-dense drinks, total energy intake, percentage energy from fat.<br>Ad: ST – assoc. with fruit, vegetable, FV, fibre consumption; + assoc. energy-dense snack, fast food, fried food consumption, energy dense drink, total energy intake, percentage energy from fat, total fat.        | C: strengths of assoc. were mainly small to moderate (no exact values given);<br>Ad: strength of assoc. was small to moderate for energy-dense drinks and snacks (no exact values given) |
| LeBlanc et al. (2012)     | 0–4y                 | Adiposity (n=11), psychosocial health (n=6), cognitive development (n=8 studies). No studies identified of bone mass, motor development or cardio metabolic health | No            | n=23<br>N= 22,417                                                                     | 13.0%               | Infants: TVST elicited no benefits and may be harmful to cognitive development; increased TVST assoc. with unfavourable adiposity.<br>Toddlers: TVST has - impact on adiposity, cognitive development, - affected psychosocial health<br>Pre-schoolers: TVST - impact on adiposity; evidence between increased TV and decreases scores on measures of psychosocial health; - relationship between TVV and cognitive development |                                                                                                                                                                                          |
| Costigan et al. (2013)    | 12-18y               | Physical, psychosocial, and/or behavioural health outcomes                                                                                                         | No            | n=33; 25 CS, 8 LS.                                                                    | 21.2%               | ST + assoc. with weight status, neck/shoulder/lower back pain, backache/headache, sleep problems and depressive symptoms;<br>- assoc. with perceived health and healthy dietary behaviour.                                                                                                                                                                                                                                      |                                                                                                                                                                                          |

1  
2  
3  
4  
5  
6  
7  
8  
9  
10  
11  
12  
13  
14  
15  
16  
17  
18  
19  
20  
21  
22  
23  
24  
25  
26  
27  
28  
29  
30  
31  
32  
33  
34  
35  
36  
37  
38  
39  
40  
41  
42  
43  
44  
45  
46  
47

| Author                  | Age   | Outcome measures                                                                                                                                                 | Meta-analysis | Studies (n, CS, LS, RCT, N of subjects)                                                                                                      | % duplicate studies | Narrative findings                                                                                                                                                                                                                                                                                                                                                                                                                                                                                                                                    | Findings of meta-analysis                                                                                                                                                                                                                                                                                                |
|-------------------------|-------|------------------------------------------------------------------------------------------------------------------------------------------------------------------|---------------|----------------------------------------------------------------------------------------------------------------------------------------------|---------------------|-------------------------------------------------------------------------------------------------------------------------------------------------------------------------------------------------------------------------------------------------------------------------------------------------------------------------------------------------------------------------------------------------------------------------------------------------------------------------------------------------------------------------------------------------------|--------------------------------------------------------------------------------------------------------------------------------------------------------------------------------------------------------------------------------------------------------------------------------------------------------------------------|
| Tremblay et al. (2012)  | 5-17y | Body composition, physical fitness, metabolic syndrome, cardiovascular risk, self-esteem, pro-social behaviour, academic performance                             | Yes           | n=232; 8 RCTs, 10 intervention studies, 37 LS & 177 CS. N= 983,840                                                                           | 2.2%                | +assoc. between adiposity and TVST; assoc. between ST and higher cholesterol and blood pressure, HbA1c and insulin insensitivity;<br><br>- relationship between ST and self-esteem;<br><br>>2 hours/day ST assoc. with lower cardiorespiratory fitness.                                                                                                                                                                                                                                                                                               | TVST and BMI was the only area where data allowed meta-analysis; 4 RCTs included in the meta-analysis: Decreased TVST assoc. with decrease in BMI (-0.89kg/m2 (95% CI of -1.467 to -0.11, p = 0.01)                                                                                                                      |
| Suchert et al. (2015)   | 5-18y | Depressive symptoms, anxiety symptoms, internalizing problems, self-esteem, eating disorder symptoms, hyperactivity and inattention problems, well-being and QoL | No            | n=91; 73 CS, 16 LS, 2 RCT. N not reported.                                                                                                   | 7.7%                | + assoc. between ST and hyperactivity/inattention problems, internalizing problems, poorer psychological wellbeing and perceived QoL. Indeterminate assoc. between SBB and depressive and anxiety symptoms, self-esteem and eating disorder symptoms.                                                                                                                                                                                                                                                                                                 |                                                                                                                                                                                                                                                                                                                          |
| van Ekris et al. (2016) | < 18y | Anthropometrics, cardiometabolic risk, blood pressure, fitness, other biomedical health indicators                                                               | Yes           | n=109; N=24,257 for MA of TVV and BMI from 9 prospective cohorts. N=6971 for MA of computer screen viewing & BMI from 5 prospective cohorts. | 5.2%                | + relationship between TVST and overweight/obesity incidence and overweight/obesity incidence; NoE for relationship between computer use/game time with BMI/BMI z score or WC/WC z-score; + relationship between ST and BMI/BMI z-score and overweight/obesity.<br><br>NoE for relationship between ST and triglycerides and glucose, LDL-cholesterol, ratio of total cholesterol to HDL cholesterol and systolic and diastolic blood pressure; - relationship between TVST and cardiorespiratory fitness/VO2max ; InE with strength and being unfit, | MA: BMI at follow-up was not significantly associated with each additional hour of TV viewing ( $\beta = 0.01$ , 95%CI = [-0.002; 0.02]) or computer use ( $\beta = 0.00$ , 95%CI = [-0.004; 0.01]) per day, with high heterogeneity in each analysis. Adjustment for physical activity or diet did not change findings. |

For peer review only

| Author               | Age    | Outcome measures                                                                                                                                              | Meta-analysis | Studies (n, CS, LS, RCT, N of subjects)                                                                      | % duplicate studies | Narrative findings                                                                                                                                                                                                                                                             | Findings of meta-analysis |
|----------------------|--------|---------------------------------------------------------------------------------------------------------------------------------------------------------------|---------------|--------------------------------------------------------------------------------------------------------------|---------------------|--------------------------------------------------------------------------------------------------------------------------------------------------------------------------------------------------------------------------------------------------------------------------------|---------------------------|
|                      |        |                                                                                                                                                               |               |                                                                                                              |                     | cardiorespiratory fitness/VO2max and metabolic risk z- scores, asthma and bone mass indicators.                                                                                                                                                                                |                           |
| Carson et al. (2016) | 5-17y  | Body composition, Metabolic syndrome/cardiovascular disease risk factors, academic achievement, fitness, self-esteem                                          | No            | n=235; 1 RCT, 1 cross-over trial, 49 LS, 5 CC and 179 CS. 35 used accelerometer measures of SB. N not stated | 3.5%                | Higher ST assoc. with unfavourable body composition, overweight/obese and with clustered risk factor score and lower cardiorespiratory fitness, unfavourable measures of behaviour, lower self-esteem (TVST); inconsistent findings for assoc. with lower academic attainment. |                           |
| Hoare et al (2016)   | 10-19y | Depressive symptomatology, anxiety symptomatology, self-esteem, suicide ideation, other mental health indicators                                              | No            | n=32; 1 RCT, 6 LS, 24 CS                                                                                     | 21.9%               | + relationship between ST and depressive symptomatology, psychological distress and ST duration and severity of anxiety symptoms. + relationship between low self-esteem and screen time. InE for relationship between ST and suicidal ideation.                               |                           |
| Duch et al. (2013)   | < 3y   | biological and demographic factors, family biological and demographic factors, family structure factors, behavioral factors, structural environmental factors | No            | n=29; 18 CS, 10 LS, 1 RCT. N not stated                                                                      | 3.5%                | + assoc. between ST and age and BMI. InE on ST and sleep duration and crying duration.                                                                                                                                                                                         |                           |
| Marsh et al. (2013)  | 5-24y  | Energy intake measured objectively in experimental studies using an experimental meal during 2 exposure scenarios                                             | No            | n=10; 8 RCT and 2 quasi-experimental studies                                                                 | 0                   | ST (in the absence of food advertising) assoc. with increased dietary intake; TVST increases intake of very palatable energy-dense foods; stimulatory effects of TVST on intake were stronger in overweight/obese c than those of normal weight                                |                           |

1  
2  
3  
4  
5  
6  
7  
8  
9  
10  
11  
12  
13  
14  
15  
16  
17  
18  
19  
20  
21  
22  
23  
24  
25  
26  
27  
28  
29  
30  
31  
32  
33  
34  
35  
36  
37  
38  
39  
40  
41  
42  
43  
44  
45  
46  
47

| Author                        | Age    | Outcome measures                       | Meta-analysis                                         | Studies (n, CS, LS, RCT, N of subjects)                 | % duplicate studies | Narrative findings                                                                                                                                                                                                                                                                                          | Findings of meta-analysis                                                                                                                                                                                                                                                                                                                                                                                                                                                                         |
|-------------------------------|--------|----------------------------------------|-------------------------------------------------------|---------------------------------------------------------|---------------------|-------------------------------------------------------------------------------------------------------------------------------------------------------------------------------------------------------------------------------------------------------------------------------------------------------------|---------------------------------------------------------------------------------------------------------------------------------------------------------------------------------------------------------------------------------------------------------------------------------------------------------------------------------------------------------------------------------------------------------------------------------------------------------------------------------------------------|
| Hale and Guan (2015)          | 5-17y  | Sleep outcomes                         | No                                                    | n=67; 3 RCT.                                            | 0                   | Assoc. with at least one of the sleep outcomes (delayed bedtime, shortened total sleep time, daytime tiredness, sleep onset latency) was found for computer use, video gaming, mobile device, unspecified ST.                                                                                               |                                                                                                                                                                                                                                                                                                                                                                                                                                                                                                   |
| de Oliveira and Guedes (2016) | 10-19y | Metabolic Syndrome (MetS)              | Yes. ST dichotomised as <=2hrs v. >2hrs for analyses. | n=21 - 9 examined ST. 8 CS, 1 CC. N=8680                | 0                   | Inconclusive evidence for the assoc. of ST or TVST with presence of the MetS.                                                                                                                                                                                                                               | Significant assoc. was not identified between ST and MetS; OR for MetS in relation to >2hrs ST = 1.20 (CI 95%, 0.91 to 1.59) p = 0.20, n = 3,881, studies = 6, I2 = 37%).<br><br>Subgroup analysis: no significant assoc. between ST and MetS through the whole week (OR = 1.03 (CI 95%, 0.75 to 1.42) p = 0.84, n = 2,261, studies = 4, I2 = 24%) however there was a significant assoc. between weekend ST and MetS (OR = 2.05 (CI 95%, 1.13 to 3.73) p = 0.02, n = 1,620 studies = 2, I2 = 0%) |
| Wu et al. (2017)              | 3-18y  | Health-related quality of life (HRQOL) | Yes. ST dichotomised as <2-2.4hrs v. ≥2-2.5hrs        | n=31, 17 examined ST. 13 CS, 1LS. Total N not reported. |                     | - assoc of ST with with HRQOL, consistent across television, computer and video screentime and across CSS and LS. 1 IS reported a dose-response relationship between screentime and HRQOL. HRQOL was lower across physical, mental and psychosocial health, school functioning, and general health domains. | Significant assoc. Between higher screentime and lower HRQOL: >2-2.5hrs/day ST associated with fall in HRQOL by 2.71 (1.59, 3.38; studies=2).                                                                                                                                                                                                                                                                                                                                                     |

For Peer Review Only

1  
2  
3  
4  
5 Table notes:

6 + or – used for direction of association of screentime (ST) with health outcomes.

7 n refers to studies whilst N refers to total number of participants across the reviews.

8  
9 % duplicate studies refers to the proportion of studies within a review that were included in any other included review  
10  
11  
1213  
14 Table abbreviations

15 assoc. associated with

16 Ad adolescent

17 C child

18 CC case-control study

19 CS cross-sectional study

20 FV fruit and vegetable

21 MA meta-analysis

22 NoE no evidence

23 LS longitudinal study

24 QOL quality of life

25 ST screentime

26 TST total sleep time

27 TVST television screentime  
28  
29  
30  
31  
32  
33  
34  
35  
36  
37  
38  
39  
40  
41  
42  
43  
44  
45  
46  
47



Table 2. Quality assessment for included reviews

|                                      | Provides <i>a priori</i> design | Duplicate data extraction | Search ≥2 databases plus another mode of searching | Searched for reports regardless of their publication types | Included a list of included studies | Reports characteristics of individual studies | Assesses quality of studies | Uses the scientific quality of the studies appropriately | Uses appropriate methods to combine the findings of studies | Assessed likelihood of publication bias | Includes conflict of interest statement | Overall quality rating |
|--------------------------------------|---------------------------------|---------------------------|----------------------------------------------------|------------------------------------------------------------|-------------------------------------|-----------------------------------------------|-----------------------------|----------------------------------------------------------|-------------------------------------------------------------|-----------------------------------------|-----------------------------------------|------------------------|
| Pearson & Biddle                     | N                               | Y                         | N                                                  | N                                                          | Y                                   | N                                             | Y                           | Y                                                        | Y                                                           | N                                       | Y                                       | low                    |
| Hale and Guan                        | N                               | N                         | Y                                                  | N                                                          | Y                                   | N                                             | N                           | N                                                        | Y                                                           | N                                       | Y                                       | low                    |
| Marsh et al.                         | N                               | N                         | Y                                                  | Y                                                          | Y                                   | Y                                             | Y                           | Y                                                        | Y                                                           | N                                       | N                                       | medium                 |
| Costigan et al.                      | N                               | N                         | Y                                                  | N                                                          | Y                                   | Y                                             | Y                           | Y                                                        | Y                                                           | N                                       | Y                                       | medium                 |
| Dutch et al.                         | N                               | Y                         | Y                                                  | N                                                          | N                                   | Y                                             | N                           | N                                                        | Y                                                           | N                                       | Y                                       | low                    |
| Goncalves de Oliveira & Pinto Guedes | Y                               | Y                         | Y                                                  | N                                                          | Y                                   | Y                                             | Y                           | Y                                                        | Y                                                           | Y                                       | Y                                       | high                   |
| Hoare et al.                         | N                               | Y                         | Y                                                  | N                                                          | Y                                   | Y                                             | Y                           | Y                                                        | Y                                                           | N                                       | Y                                       | medium                 |
| Carson et al.                        | Y                               | Y                         | Y                                                  | N                                                          | Y                                   | Y                                             | Y                           | Y                                                        | Y                                                           | N                                       | Y                                       | medium                 |
| LeBlanc et al.                       | Y                               | Y                         | Y                                                  | N                                                          | Y                                   | Y                                             | Y                           | Y                                                        | Y                                                           | N                                       | Y                                       | medium                 |
| Tremblay et al.                      | N                               | Y                         | Y                                                  | Y                                                          | Y                                   | Y                                             | Y                           | Y                                                        | Y                                                           | N                                       | Y                                       | medium                 |
| van Ekris et al.                     | N                               | Y                         | Y                                                  | N                                                          | Y                                   | Y                                             | Y                           | Y                                                        | Y                                                           | N                                       | Y                                       | medium                 |
| Suchert et al.                       | N                               | N                         | Y                                                  | N                                                          | Y                                   | Y                                             | Y                           | Y                                                        | Y                                                           | N                                       | Y                                       | medium                 |
| Wu et al.                            | N                               | Y                         | Y                                                  | Y                                                          | Y                                   | Y                                             | Y                           | Y                                                        | Y                                                           | Y                                       | N                                       | medium                 |

Table 3. Mapping of reviews to subject area by quality

|                                                  | High quality reviews                    | Medium quality reviews                                                                                                | Low quality reviews        |
|--------------------------------------------------|-----------------------------------------|-----------------------------------------------------------------------------------------------------------------------|----------------------------|
| Body composition including obesity               |                                         | Le Blanc et al.<br>Costigan et al.<br>Tremblay et al.<br>van Ekris et al.<br>Carson et al.                            | Duch et al.                |
| Diet and energy intake                           |                                         | Costigan et al.<br>Marsh et al.                                                                                       | Pearson & Biddle           |
| Mental health outcomes including quality of life |                                         | Le Blanc et al.<br>Costigan et al.<br>Tremblay et al.<br>Suchert et al.<br>Carson et al.<br>Hoare et al.<br>Wu et al. |                            |
| Cardiovascular risk                              | Goncalves de Oliveira &<br>Pinto Guedes | Tremblay et al.<br>van Ekris et al.<br>Carson et al.                                                                  |                            |
| Fitness                                          |                                         | Costigan et al.<br>Tremblay et al.<br>van Ekris et al.<br>Carson et al.                                               |                            |
| Cognition, development and attainments           |                                         | Le Blanc et al.<br>Tremblay et al.<br>Carson et al.                                                                   |                            |
| Sleep                                            |                                         | Costigan et al.                                                                                                       | Duch et al.<br>Hale & Guan |

## References

1. Marsh S, Ni Mhurchu C, Maddison R. The non-advertising effects of screen-based sedentary activities on acute eating behaviours in children, adolescents, and young adults. A systematic review. *Appetite* 2013;71(1):259-73. doi: 10.1016/j.appet.2013.08.017
2. Iannotti RJ, Janssen I, Haug E, et al. Interrelationships of adolescent physical activity, screen-based sedentary behaviour, and social and psychological health. *International journal of public health* 2009;54 Suppl 2:191-8. doi: 10.1007/s00038-009-5410-z
3. Klesges RC, Shelton ML, Klesges LM. Effects of television on metabolic rate: potential implications for childhood obesity. *Pediatrics* 1993;91(2):281-86.
4. Domingues-Montanari S. Clinical and psychological effects of excessive screen time on children. *J Paediatr Child Health* 2017;53(4):333-38. doi: 10.1111/jpc.13462
5. Reid Chassiakos YL, Radesky J, Christakis D, et al. Children and Adolescents and Digital Media. *Pediatrics* 2016;138(5) doi: 10.1542/peds.2016-2593
6. Costigan SA, Bennett L, Plotnikoff RC, et al. The Health Indicators Associated With Screen-Based Sedentary Behaviour Among Adolescent Girls: A Systematic Review. *Journal of Adolescent Health* 2013;52(4):382-92.
7. Duch H, Fisher EM, Ensari I, et al. Screen time use in children under 3 years old: a systematic review of correlates. *International Journal of Behavioral Nutrition and Physical Activity* 2013;10(102)
8. Tremblay MS, LeBlanc AG, Kho ME, et al. Systematic review of sedentary behaviour and health indicators in school-aged children and youth. *International Journal of Behavioral Nutrition and Physical Activity* 2011;8(98)
9. van Ekris E, Altenburg TM, Singh AS, et al. An evidence-update on the prospective relationship between childhood sedentary behaviour and biomedical health indicators: a systematic review and meta-analysis. *Obesity reviews* 2016;17(9):833-49.
10. Peter Etchells on behalf of all signatories. Open letter: There is an important debate to be had about screen time, but we need quality research and evidence to support it. Guardian. London, 2016.
11. Liberati A, Altman DG, Tetzlaff J, et al. The PRISMA statement for reporting systematic reviews and meta-analyses of studies that evaluate healthcare interventions: explanation and elaboration. *BMJ* 2009;339:b2700. doi: 10.1136/bmj.b2700 [published Online First: 2009/07/23]
12. Shackleton N, Jamal F, Viner R, et al. Systematic review of reviews of observational studies of school-level effects on sexual health, violence and substance use. *Health Place* 2016;39:168-76. doi: 10.1016/j.healthplace.2016.04.002
13. Caird J, Sutcliffe K, Kwan I, et al. Mediating policy-relevant evidence at speed: are systematic reviews of systematic reviews a useful approach? *Evidence and Policy* 2014:ISSN 1744-2648
14. Carson V, Hunter S, Kuzik N, et al. Systematic review of sedentary behaviour and health indicators in school-aged children and youth: an update. *Applied Physiology, Nutrition, and Metabolism* 2016;41(6):S240-65.
15. LeBlanc AG, Spence JC, Carson V, et al. Systematic review of sedentary behaviour and health indicators in the early years (aged 0-4 years). *Applied Physiology, Nutrition, and Metabolism* 2012;37(4):753-72.
16. Pearson N, Biddle SJH. Sedentary Behaviour and Dietary Intake in Children, Adolescent, and Adults. *American Journal of Preventive Medicine* 2011;41(2):178-88.

17. Hoare E, Milton K, Foster C, et al. The associations between sedentary behaviour and mental health among adolescents: a systematic review. *International Journal of Behavioral Nutrition and Physical Activity* 2016;13(108)
18. Suchert V, Hanewinkel R, Isensee B. Sedentary behavior and indicators of mental health in school-aged children and adolescents: A systematic review. *Preventive Medicine* 2015;76:48-57.
19. Wu XY, Han LH, Zhang JH, et al. The influence of physical activity, sedentary behavior on health-related quality of life among the general population of children and adolescents: A systematic review. *PloS one* 2017;12(11):e0187668. doi: 10.1371/journal.pone.0187668 [published Online First: 2017/11/10]
20. Goncalves de Oliveira R, Pinto Guedes D. Physical Activity, Sedentary Behavior, Cardiorespiratory Fitness and Metabolic Syndrome in Adolescents: Systematic Review and Meta-Analysis of Observational Evidence. *PLoS One* 2016;11(12):1-24.
21. Hale L, Guan S. Screen time and sleep among school-aged children and adolescents: A systematic review *Sleep Medicine reviews* 2015;21:50-58.
22. Jago R, Sebire SJ, Gorely T, et al. "I'm on it 24/7 at the moment": a qualitative examination of multi-screen viewing behaviours among UK 10-11 year olds. *Int J Behav Nutr Phys Act* 2011;8:85. doi: 10.1186/1479-5868-8-85 [published Online First: 2011/08/05]
23. Przybylski AK, Weinstein N. A Large-Scale Test of the Goldilocks Hypothesis. *Psychol Sci* 2017;28(2):204-15. doi: 10.1177/0956797616678438
24. Thomson D, Russell K, Becker L, et al. The evolution of a new publication type: steps and challenges of producing overviews of reviews. *Research Synthesis Methods* 2010;1:198-211.

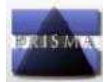

# PRISMA 2009 Checklist

| Section/topic                      | #  | Checklist item                                                                                                                                                                                                                                                                                              | Reported on page #           |
|------------------------------------|----|-------------------------------------------------------------------------------------------------------------------------------------------------------------------------------------------------------------------------------------------------------------------------------------------------------------|------------------------------|
| <b>TITLE</b>                       |    |                                                                                                                                                                                                                                                                                                             |                              |
| Title                              | 1  | Identify the report as a systematic review, meta-analysis, or both.                                                                                                                                                                                                                                         | 1                            |
| <b>ABSTRACT</b>                    |    |                                                                                                                                                                                                                                                                                                             |                              |
| Structured summary                 | 2  | Provide a structured summary including, as applicable: background; objectives; data sources; study eligibility criteria, participants, and interventions; study appraisal and synthesis methods; results; limitations; conclusions and implications of key findings; systematic review registration number. | 2                            |
| <b>INTRODUCTION</b>                |    |                                                                                                                                                                                                                                                                                                             |                              |
| Rationale                          | 3  | Describe the rationale for the review in the context of what is already known.                                                                                                                                                                                                                              | 4                            |
| Objectives                         | 4  | Provide an explicit statement of questions being addressed with reference to participants, interventions, comparisons, outcomes, and study design (PICOS).                                                                                                                                                  | 5                            |
| <b>METHODS</b>                     |    |                                                                                                                                                                                                                                                                                                             |                              |
| Protocol and registration          | 5  | Indicate if a review protocol exists, if and where it can be accessed (e.g., Web address), and, if available, provide registration information including registration number.                                                                                                                               | Registered Prospero database |
| Eligibility criteria               | 6  | Specify study characteristics (e.g., PICOS, length of follow-up) and report characteristics (e.g., years considered, language, publication status) used as criteria for eligibility, giving rationale.                                                                                                      | 5                            |
| Information sources                | 7  | Describe all information sources (e.g., databases with dates of coverage, contact with study authors to identify additional studies) in the search and date last searched.                                                                                                                                  | 5                            |
| Search                             | 8  | Present full electronic search strategy for at least one database, including any limits used, such that it could be repeated.                                                                                                                                                                               | 5                            |
| Study selection                    | 9  | State the process for selecting studies (i.e., screening, eligibility, included in systematic review, and, if applicable, included in the meta-analysis).                                                                                                                                                   | 5                            |
| Data collection process            | 10 | Describe method of data extraction from reports (e.g., piloted forms, independently, in duplicate) and any processes for obtaining and confirming data from investigators.                                                                                                                                  | 5                            |
| Data items                         | 11 | List and define all variables for which data were sought (e.g., PICOS, funding sources) and any assumptions and simplifications made.                                                                                                                                                                       | N/A                          |
| Risk of bias in individual studies | 12 | Describe methods used for assessing risk of bias of individual studies (including specification of whether this was done at the study or outcome level), and how this information is to be used in any data synthesis.                                                                                      | 6                            |
| Summary measures                   | 13 | State the principal summary measures (e.g., risk ratio, difference in means).                                                                                                                                                                                                                               | N/A                          |

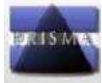

# PRISMA 2009 Checklist

|                      |    |                                                                                                                                                           |   |
|----------------------|----|-----------------------------------------------------------------------------------------------------------------------------------------------------------|---|
| Synthesis of results | 14 | Describe the methods of handling data and combining results of studies, if done, including measures of consistency (e.g., $I^2$ ) for each meta-analysis. | 6 |
|----------------------|----|-----------------------------------------------------------------------------------------------------------------------------------------------------------|---|

Page 1 of 2

| Section/topic                 | #  | Checklist item                                                                                                                                                                                           | Reported on page # |
|-------------------------------|----|----------------------------------------------------------------------------------------------------------------------------------------------------------------------------------------------------------|--------------------|
| Risk of bias across studies   | 15 | Specify any assessment of risk of bias that may affect the cumulative evidence (e.g., publication bias, selective reporting within studies).                                                             | 6                  |
| Additional analyses           | 16 | Describe methods of additional analyses (e.g., sensitivity or subgroup analyses, meta-regression), if done, indicating which were pre-specified.                                                         | N/A                |
| <b>RESULTS</b>                |    |                                                                                                                                                                                                          |                    |
| Study selection               | 17 | Give numbers of studies screened, assessed for eligibility, and included in the review, with reasons for exclusions at each stage, ideally with a flow diagram.                                          | 7 & Figure 1       |
| Study characteristics         | 18 | For each study, present characteristics for which data were extracted (e.g., study size, PICOS, follow-up period) and provide the citations.                                                             | Table 1            |
| Risk of bias within studies   | 19 | Present data on risk of bias of each study and, if available, any outcome level assessment (see item 12).                                                                                                | Table 2 p23        |
| Results of individual studies | 20 | For all outcomes considered (benefits or harms), present, for each study: (a) simple summary data for each intervention group (b) effect estimates and confidence intervals, ideally with a forest plot. | N/A                |
| Synthesis of results          | 21 | Present results of each meta-analysis done, including confidence intervals and measures of consistency.                                                                                                  | 7-13               |
| Risk of bias across studies   | 22 | Present results of any assessment of risk of bias across studies (see Item 15).                                                                                                                          | N/A                |
| Additional analysis           | 23 | Give results of additional analyses, if done (e.g., sensitivity or subgroup analyses, meta-regression [see Item 16]).                                                                                    | N/A                |
| <b>DISCUSSION</b>             |    |                                                                                                                                                                                                          |                    |
| Summary of evidence           | 24 | Summarize the main findings including the strength of evidence for each main outcome; consider their relevance to key groups (e.g., healthcare providers, users, and policy makers).                     | 13                 |
| Limitations                   | 25 | Discuss limitations at study and outcome level (e.g., risk of bias), and at review-level (e.g., incomplete retrieval of identified research, reporting bias).                                            | 14-15              |
| Conclusions                   | 26 | Provide a general interpretation of the results in the context of other evidence, and implications for future research.                                                                                  | 15                 |
| <b>FUNDING</b>                |    |                                                                                                                                                                                                          |                    |
| Funding                       | 27 | Describe sources of funding for the systematic review and other support (e.g., supply of data); role of funders for the systematic review.                                                               | 16                 |

For peer review only - <http://bmjopen.bmj.com/site/about/guidelines.xhtml>

From: Moher D, Liberati A, Tetzlaff J, Altman DG, The PRISMA Group (2009). Preferred Reporting Items for Systematic Reviews and Meta-Analyses: The PRISMA Statement. PLoS Med 6(7): e1000097.

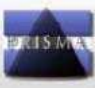

# PRISMA 2009 Checklist

1  
2  
3  
4  
5  
6  
7  
8  
9  
10  
11  
12  
13  
14  
15  
16  
17  
18  
19  
20  
21  
22  
23  
24  
25  
26  
27  
28  
29  
30  
31  
32  
33  
34  
35  
36  
37  
38  
39  
40  
41  
42  
43  
44  
45  
46  
47

doi:10.1371/journal.pmed1000097

For more information, visit: [www.prisma-statement.org](http://www.prisma-statement.org).

Page 2 of 2

For peer review only

# BMJ Open

## The effects of screentime on the health and well-being of children and adolescents: a systematic review of reviews

|                                 |                                                                                                                                                                                                       |
|---------------------------------|-------------------------------------------------------------------------------------------------------------------------------------------------------------------------------------------------------|
| Journal:                        | <i>BMJ Open</i>                                                                                                                                                                                       |
| Manuscript ID                   | bmjopen-2018-023191.R1                                                                                                                                                                                |
| Article Type:                   | Research                                                                                                                                                                                              |
| Date Submitted by the Author:   | 11-Oct-2018                                                                                                                                                                                           |
| Complete List of Authors:       | Stiglic, Neza; UCL Institute of child health, Population, policy and practice research programme<br>Viner, Russell; UCL Institute of child health, Population, policy and practice research programme |
| <b>Primary Subject Heading</b>: | Paediatrics                                                                                                                                                                                           |
| Secondary Subject Heading:      | Epidemiology, Paediatrics, Public health                                                                                                                                                              |
| Keywords:                       | screentime, chil health, obesity, MENTAL HEALTH                                                                                                                                                       |
|                                 |                                                                                                                                                                                                       |

SCHOLARONE™  
Manuscripts



# The effects of screentime on the health and well-being of children and adolescents: a systematic review of reviews

## Authors

Neza Stiglic

Russell M. Viner

## Affiliation

Population, Policy and Practice Research Programme

UCL Institute of Child Health, 30 Guilford St. London WC1N 1EH, UK

## Correspondence

Prof. Russell Viner

UCL Institute of Child Health

30 Guilford St.

London WC1N 1EH, UK

[r.viner@ucl.ac.uk](mailto:r.viner@ucl.ac.uk)

Tel: 020 7242 9789

## Abstract

### Objectives

To systematically examine the evidence of harms and benefits relating to time spent on screens for children and young people's (CYP) health and wellbeing, to inform policy.

### Methods

Systematic review of reviews (RoR) undertaken to answer the question "What is the evidence for health and wellbeing effects of screentime in children and adolescents (CYP)?" Electronic databases were searched for systematic reviews in February 2018. Eligible reviews reported associations between time on screens (screentime; any type) and any health/wellbeing outcome in CYP. Quality of reviews was assessed and strength of evidence across reviews evaluated. Prospero registration: CRD42018089483

### Results

13 reviews were identified (1 high quality, 9 medium and 3 low quality ). 6 addressed body composition; 3 diet/energy intake; 7 mental health; 4 cardiovascular risk; 4 for fitness; 3 for sleep; 1 pain; 1 asthma. We found moderately-strong evidence for associations between screentime and greater obesity/adiposity and higher depressive symptoms; moderate evidence for an association between screentime and higher energy intake, less healthy diet quality and poorer quality of life. There was weak evidence for associations of screentime with behaviour problems, anxiety, hyperactivity and inattention, poorer self-esteem, poorer wellbeing and poorer psychosocial health, metabolic syndrome, poorer cardiorespiratory fitness, poorer cognitive development and lower educational attainments and poor sleep outcomes. There was no or insufficient evidence for an association of screentime with eating disorders or suicidal ideation, individual cardiovascular risk factors, asthma prevalence or pain. Evidence for threshold effects was weak. We found weak evidence that small amounts of daily screen use is not harmful and may have some benefits.

### Conclusions

There is evidence that higher levels of screentime is associated with a variety of health harms for CYP, with evidence strongest for adiposity, unhealthy diet, depressive symptoms and quality of life. Evidence to guide policy on safe CYP screentime exposure is limited.

**Strengths and limitations of this study**

- Undertook a systematic review of reviews (RoR) in multiple electronic databases using a pre-specified methodology
- Included only studies that directly reported screentime separately from other sedentary behaviours
- Used assessment of review quality and weight of supportive evidence to assign strength of evidence to findings
- Quality of included reviews was predominantly moderate or low, dominated by studies of television screentime, with screentime largely self-reported
- Data on mobile screen use was extremely limited and our review did not address the content or context of screen viewing

For peer review only

## Introduction

The screen, whether it is computer, mobile, tablet or television, is a symbol of our modern age. For our children, the 'digital natives' who have grown up surrounded by digital information and entertainment on screens, time on screens (screentime) is a major part of contemporary life.

However there have been growing concerns about the impact of screens on children and young people's (CYP) health. There is evidence that screentime is associated with obesity, with suggested mechanisms an increase in energy intake,<sup>1</sup> the displacement of time available for physical activity,<sup>2</sup> or more directly through reduction in metabolic rate.<sup>3</sup> There is also evidence that high screentime is associated with deleterious effects on irritability, low mood and cognitive and socio-emotional development, leading to poor educational performance.<sup>4</sup>

Because of these concerns, expert groups have suggested controlling screentime for children. The American Academy of Pediatrics (AAP) in 2016 recommended limiting screentime for 2-5 year olds to 1 hour per day of high-quality programs and for parents to limit screentime in agreement with CYP 6 years and older.<sup>5</sup> The Canadian Paediatric Society issued similar guidelines in 2017.<sup>6</sup>

However there has been criticism of professional guidelines as non-evidenced-based,<sup>7</sup> as evidence for an impact of screentime on health is inconsistent, with systematic reviews showing inconsistent findings.<sup>8-11</sup> This may in part be due to failure to separate screentime from non-screen sedentary behaviours characterised by low physical movement and energy expenditure. It may also be due to a failure to separate the sedentary elements of screentime from the content watched on screens. Others have argued that screen-based digital media have potential significant health, social and cognitive benefits and that harms are over-stated. A prominent group of scientists recently argued that messages that screens are inherently harmful "is simply not supported by solid research and evidence".<sup>12</sup> Others have noted that education and industry sectors frequently promote expanded use of digital devices by CYP.<sup>13</sup>

Our aim was to systematically examine the evidence on the effects of time spent using screens on health and wellbeing amongst CYP. Systematic reviews of reviews (RoR or umbrella reviews) are particularly suited to quickly collating the strength of evidence across a very broad area to guide policy. We therefore undertook an RoR of the effects of screentime of any type on CYP health and wellbeing outcomes.

## Methods

We undertook a systematic review of published systematic reviews, reporting Methods and Findings using the PRISMA checklist.<sup>14</sup> The review was registered with the Prospero registry of systematic reviews (registration number CRD42018089483).

### Review question

Our review question was "What is the evidence for health and wellbeing effects of screentime in children and adolescents?"

### Search strategy

We searched electronic databases (Medline, EMBASE, PsycInfo and Cinahl) in February 2018. We used the search terms in Medline as follows: '(child OR teenager OR adolescent OR youth) AND (screen time OR television OR computer OR sedentary behaviour OR sedentary activity) AND health', with publication type limited to 'systematic review, with or without meta-analysis'. Similar search terms were used in the other databases. We did not limit studies by date or language. Identified relevant reviews were hand-searched for additional likely references.

### Eligibility criteria

We only included systematic reviews which fulfilled the following eligibility criteria:

- i. Systematically searched and reviewed the literature using prespecified protocols
- ii. examined children or adolescents from 0 – 18 years. Studies with a wider age range which provided data on children/adolescents separately were eligible.
- iii. assessed and reported screentime i.e. time spent on screens of any type, including self-report or measured/observed measures.
- iv. examined health and wellbeing impacts on children or adolescents

We excluded reviews in which screentime was not defined adequately or where time on screens was not separated from other forms of sedentary behaviour, e.g. sitting while talking/homework/reading, time spent in a car etc. Where reviews examined overall sedentary behaviour but reported findings for screentime separately to other forms of sedentary behaviour, these were included. However reviews that did not separate screentime from other sedentary behaviour were not included. Where authors updated a review which included all previous studies, we only included the later review to avoid duplication.

### Study selection

A flowchart of study identification and selection is shown in Figure 1. Titles and abstracts were reviewed and potentially eligible articles identified after removal of duplicates. The abstracts of 389 articles were reviewed and 161 potentially eligible articles were identified which appeared to meet the eligibility criteria. After review of full text to determine final eligibility, 13 reviews are included in this review. Characteristics of the included reviews are shown in Table 1.

### Data extraction

Descriptive findings and results of any quantitative meta-analyses were extracted to a spreadsheet by NS and fully checked for accuracy by RV.

## Evaluation of quality

The quality of systematic reviews including risk of bias was assessed using the adapted version of Assessing the Methodological Quality of Systematic Reviews (AMSTAR).<sup>15</sup> We characterised reviews as high, medium or low quality. High-quality reviews were required to have the following: provided a priori published designs (for example published protocols or had ethics committee approval); searched at least two bibliographic databases plus conducted another mode of searching; searched for reports regardless of publication type; listed and described included studies; used at least two people for data extraction; documented the size and quality of included studies and used this to inform their syntheses; synthesised study findings narratively or statistically; assessed the likelihood of publication bias; and included a conflict of interest statement. Medium-quality reviews were required to have: searched at least one database; listed and described included studies; documented the quality of the included studies; and synthesised study findings narratively or statistically. Reviews did not meet these criteria were defined as low quality. Note we did not seek to assess the quality of primary studies included in each review.

## Data synthesis and summary measures

Synthesis began by summarising review results and conclusions in note form. Reviews were then grouped by health domain: body composition (including adiposity); diet and energy intake; mental health and wellbeing; cardiovascular risk; fitness; cognition, development and educational attainments; sleep; pain and asthma. We assessed whether the conclusions of review-level evidence appeared reasonable, for example considering effect sizes and designs. We noted meta-analyses undertaken in reviews separately to narrative findings. We noted dose-response findings where relevant. We made no attempt to quantitatively summarise findings across reviews as quantitative summaries should be undertaken at individual study level rather than at review level.

We then summarized findings across each domain according to the overall strength of evidence in terms of the consistency of findings across different reviews, the quality of the review, the design of included studies and how outcomes were assessed. In this we aimed to minimise so-called 'vote-counting' i.e. not quantifying the number of studies reporting positive and negative findings regardless of their size and quality. Instead we weighed findings according to the size and quality of reviews (as assessed by AMSTAR) as well as the design of primary studies.<sup>16</sup> In summarizing findings across reviews, we defined strong evidence as consistent evidence of an association reported by multiple high quality reviews, moderately-strong evidence as consistent evidence across multiple medium quality reviews, moderate evidence as largely consistent evidence across medium quality reviews and weak evidence as representing some evidence from medium quality reviews or more consistent evidence from poor quality reviews.<sup>15</sup>

## Patient involvement

Patients or the public were not involved in the conceptualisation or carrying out of this research.

## Results

Characteristics of the 13 included reviews are shown in Table 1 with quality assessments for included reviews shown in Table 2. The proportion of studies in each review that were also included in other reviews ranged from 0-22% (Table 1). Table 3 shows the mapping of reviews to outcome areas by quality category. The objectives of many of the included reviews overlapped and many reviews considered multiple outcomes. There were six reviews which considered the associations of screentime with body composition measures (including obesity), 3 for diet and energy intake, 7 for mental health related outcomes including self-esteem and quality of life, 4 for cardiovascular risk, 4 for fitness, 3 for sleep and 1 each for pain and asthma. The only high quality review was limited to cardiovascular risk. We describe findings by domain below.

### Body composition

Consistent evidence for an association between screentime and greater adiposity was reported in 5 medium quality reviews and 1 low quality review.

### Overall screentime

In medium quality reviews, Costigan et al.<sup>8</sup> reported that 32/33 studies, including 7/8 studies with low risk of bias, identified a strong positive association of screentime with weight status; van Ekris et al.<sup>11</sup> reported strong evidence for relationship between screentime and BMI or BMI z-score based upon 2 HQ studies and moderate evidence for relationship with overweight/obesity in 3 LQ studies; and Carson et al.<sup>17</sup> reported a strong association between screentime and unfavourable body composition (obesity or higher BMI or fat mass) in 11/13 longitudinal studies, 4/4 case-control studies and 26/36 cross-sectional studies.

In a low quality review, Duch et al.<sup>9</sup> reported a positive association between screentime and BMI in 4/4 studies.

### Television screentime

The great majority of findings related to television screentime. Tremblay et al.<sup>10</sup> reported a moderate association between television screentime and adiposity measures, identified in 94/119 cross-sectional studies and 19/28 longitudinal studies. Van Ekris et al. reported strong evidence for a positive relationship between TV viewing time and incidence of overweight/obesity over time in 3 high quality studies and in 3 low quality studies. Carson et al. reported that unfavourable adiposity was associated with television screentime in 14/16 longitudinal studies, 2/2 case-control studies and 58/71 cross-sectional studies. Le Blanc et al.<sup>18</sup> reported that the association between television screentime and unfavourable adiposity measures could be seen at all ages, but that evidence quality was low for infants and moderate for toddlers and pre-schoolers.

Two reviews reported meta-analyses relating to television screentime. Van Ekris et al. reported that across 24,257 participants from 9 prospective cohorts, BMI at follow-up was not significantly associated with each additional hour of daily TV viewing ( $\beta = 0.01$ , 95%CI = [-0.002; 0.02]), with high heterogeneity across studies. Adjustment for physical activity or diet did not materially change findings. In contrast, Tremblay et al. reported that across 4 RCTs, decreased television screentime post-intervention was associated with a pooled decrease in BMI of -0.89kg/m<sup>2</sup> (95% CI of -1.467 to -0.11,  $p = 0.01$ ).

### *Computer, video, mobile or other screentime*

Data on other forms of screentime were very sparse. In medium quality reviews, Carson et al. reported that unfavourable adiposity measures were associated with computer screentime in 3/4 studies but in 0/2 case-control studies and that findings in cross-sectional studies were highly inconsistent; Carson et al. identified no evidence for an association between video/videogame screentime and adiposity; and van Ekris et al. identified no evidence for relationship between computer /computer game screentime with BMI or BMI z score in 10 LQ studies or with WC or WC z-score in 2 LQ studies.

In the only meta-analysis, van Ekris et al. reported that across 6971 participants from 5 prospective cohorts, BMI at follow-up was not significantly associated with each additional hour of daily computer screentime ( $\beta = 0.00$ , 95%CI = [-0.004; 0.01]), with high heterogeneity across studies. Adjustment for physical activity or diet did not change findings materially.

### *Dose-response effects*

A dose-response effect for television screentime was reported by 2 medium quality reviews (Tremblay et al.; Le Blanc et al.) with a third (Carson et al.) not distinguishing between television or other screentime. Carson et al. reported that screentime dose-response was examined in 73 studies: higher screen time/TV viewing was significantly associated with unfavourable body composition with a 1-h cut-point (8/11 studies), 1.5-h cut-point (2/2 studies), 2-h cutpoint (24/34 studies), 3-h cut-point (12/13 studies), or 4-h cut-point (4/4 studies).

### *Summary*

We conclude there is moderately-strong evidence that higher television screentime is associated with greater adiposity, but that there is insufficient evidence for an association with overall screentime or non-television screentime. There is moderate evidence that a dose-response association is present for screentime or television screentime. However there is no strong evidence for a particular threshold in hours of screentime.

### *Diet and energy intake*

Associations of screentime with energy intake and/or diet factors were examined in 2 medium and 1 low quality review.

In a medium quality review of experimental studies, Marsh et al.<sup>1</sup> reported that there was strong evidence that i) screentime in the absence of food advertising was associated with increased dietary intake compared with non-screen behaviour; ii) television screentime increases intake of very palatable energy-dense foods; and that there was weak evidence for video game screentime similarly increased dietary intake. They concluded there was moderate evidence that stimulatory effects of TV on intake were stronger in overweight or obese children than those of normal weight, suggesting the former are more susceptible to environmental cues.

In a medium quality review, Costigan et al. reported a negative association of screentime with healthy dietary behaviour in 3/5 studies. In a low quality review, Pearson and Biddle<sup>19</sup> reported moderate evidence that television screentime was positively associated with total energy intake and energy dense drinks and negatively associated with fruit and vegetable consumption in longitudinal studies in both children and adolescents. In cross-sectional studies they identified moderate



1  
2  
3 evidence for the same associations for television screentime in children and for overall screentime in  
4 adolescents.  
5

### 6 *Summary*

7  
8 We conclude there is moderate evidence for an association between screentime, particularly  
9 television screentime, and higher energy intake and less healthy diet quality including higher intake  
10 of energy and lower intake of healthy food groups.  
11  
12

### 13 14 Mental health and wellbeing

15  
16 Associations between mental health and wellbeing and screentime were examined in 7 medium  
17 quality reviews.  
18

### 19 *Anxiety, depression and internalising problems*

20  
21 Only Hoare et al.<sup>20</sup> reported on associations with anxiety, and found moderate evidence for a  
22 positive association between screentime duration and severity of anxiety symptoms.  
23

24 Costigan et al. reported a positive association of screentime with depressive symptoms in 3/3  
25 studies. Similarly Hoare et al. reported strong evidence for a positive relationship between  
26 depressive symptomatology and screentime based on mix cross sectional and longitudinal studies.  
27 Hoare et al also noted there was limited evidence for association between social media screentime  
28 and depressive symptoms. Suchert et al.<sup>21</sup> reported a positive association of screentime with  
29 internalizing problems (in 6/10 studies) but noted a lack of clear evidence for depressive and anxiety  
30 symptoms when measured separately.  
31  
32

33 In terms of dose response for depressive symptoms, Hoare et al reported that higher depressive  
34 symptoms were associated with  $\geq 2$  hours of screentime daily in 3/3 studies. Suchert et al. reported  
35 that 3 studies identified a curvilinear association between screentime and depressive symptoms,  
36 such that adolescents using screens in a moderate way showed the lowest prevalence of depressive  
37 symptoms.  
38  
39

### 40 *Behaviour problems*

41  
42 Carson et al. reported that an association between screentime and behavioural problems was  
43 examined in 24 studies. In longitudinal studies, a positive association with unfavourable behavioural  
44 measures was reported in 2/2 studies for total screentime and 3/5 studies for television screentime,  
45 but a null association was reported in 3/3 studies of video game screentime. In cross-sectional  
46 studies, positive associations were reported for television screentime (4/6 studies), computer use  
47 (3/5 studies) and video game screentime (3/4 studies). In contrast, Tremblay et al concluded there  
48 was poor evidence that television screentime was associated with greater levels of behaviour  
49 problems.  
50  
51

52 In terms of dose response, Carson et al. reported that this was examined in 2 studies, which both  
53 reported that television screentime  $>1$ hour daily was associated with unfavourable measures of  
54 behaviour.  
55

### 56 *Hyperactivity and inattention*

57  
58 Hyperactivity and attention were only considered in 1 review. Suchert et al. reported that there was  
59 a positive association between screentime and hyperactivity/inattention problems in 10/11 studies.  
60

### *Other mental health problems*

Le Blanc et al. reported that there was moderate evidence that television screentime was associated with poorer psychosocial health in young children 1-4 years old.

Only one review each considered the association of screentime with eating disorders and suicidal ideation. Suchert et al. reported there was no clear evidence for an association with eating disorder symptoms, whilst Hoare et al. reported there was no clear evidence for a relationship with suicidal ideation.

### *Self-esteem*

Effects on self-esteem were considered in 3 reviews. Hoare et al. concluded there was moderate evidence for a relationship between low self-esteem and screentime. Carson et al. reported that this association was not considered in longitudinal studies but that in cross-sectional studies, lower self-esteem was associated with screentime in 2/2 studies and with computer screentime in 3/5 studies, and no clear evidence for mobile-phone screentime.

In contrast, Suchert et al. reported no clear evidence for an association with self-esteem and Tremblay et al. similarly reported unclear evidence, with only 7/14 cross-sectional studies showing an inverse relationship between screentime and self-esteem.

### *Quality of life and wellbeing*

Quality of life was considered in 1 review of Health-related quality of life (HRQOL) and in 2 reviews which reported on perceived quality of life or perceived health.

HRQOL as a formal measured construct was examined by Wu et al.<sup>22</sup> who reported consistent evidence that greater screentime was associated with lower measured HRQOL in 11/13 cross-sectional and 4/4 longitudinal studies. A meta-analysis of 2 studies found that  $\geq 2$  to 2.5hrs per day of screentime was associated with significantly lower HRQOL (pooled mean difference in HRQOL score 2.71 (1.59, 3.38) points) than those with  $< 2$ -2.5hrs per day.

Suchert et al. reported that there was a positive association between screentime and poorer psychological wellbeing or perceived quality of life in 11/15 studies. Costigan et al. reported a negative association between screentime and perceived health in 4/4 studies.

### *Adjustment for physical activity*

Suchert et al. reported that 11 included studies examined the association between screentime and mental health adjusted for physical activity. They reported that in each study the association between screentime and poorer mental health (a range of outcomes) was robust to adjustment for physical activity, suggesting that screentime is a risk factor for poor mental health independently of displacement of physical activity.

### *Summary*

There is moderately strong evidence for an association between screentime and depressive symptoms. This association is for overall screentime but there is very limited evidence from only one review for an association with social media screentime. There is moderate evidence for a dose-response effect, with weak evidence for a threshold of  $\geq 2$  hours daily screentime for the association with depressive symptoms.

1  
2  
3 There is moderate evidence for an association of screentime with lower HRQOL, with weak evidence  
4 for a threshold of  $\geq 2$  hours daily screentime.  
5

6 There is weak evidence for association of screentime with behaviour problems, anxiety,  
7 hyperactivity and inattention, poorer self-esteem and poorer psychosocial health in young children.  
8 There is no clear evidence for an association with eating disorders or suicidal ideation. There is weak  
9 evidence that the association between screentime and mental health is independent of the  
10 displacement of physical activity.  
11  
12  
13

#### 14 Cardiovascular risk

15  
16 Associations between screentime and cardiovascular risk were examined by 1 high quality and 3  
17 medium quality reviews.  
18

#### 19 *Metabolic syndrome / clusters of cardiovascular risk factors*

20  
21 In the only high quality review, Goncalves de Oliveira and Pinto Guedes<sup>23</sup> reported there was null  
22 evidence for the association of screentime or television screentime with the presence of the  
23 metabolic syndrome (MetS). In meta-analysis across 6 studies (n=3881), they did not identify a  
24 significant relationship, with the odds ratio (OR) for >2hrs screentime = 1.20 (CI 95%, 0.91 to 1.59) p  
25 = 0.20; I<sup>2</sup> = 37%). However when weekend screentime was examined separately in 2 studies  
26 (n=1620), they found a significant association with presence of the MetS (OR = 2.05 (CI 95%, 1.13 to  
27 3.73) p = 0.02; I<sup>2</sup> = 0%). In a medium quality review, Carson et al. reported that an association  
28 between a clustered risk factor score and television screentime was reported in 2/2 longitudinal  
29 studies and 6/10 cross-sectional studies.  
30  
31  
32

#### 33 *Individual cardiovascular risk factors*

34  
35 Three medium quality reviews examined the evidence for an association between screentime  
36 various individual risk factors, e.g. cholesterol, blood pressure, HbA<sub>1c</sub> or insulin insensitivity.  
37 Tremblay et al, van Ekris et al and Carson et al. each reported there was no consistent evidence for  
38 an association with any risk factor, with evidence largely limited to single studies and not consistent  
39 across studies.  
40

#### 41 *Summary*

42  
43 There is weak evidence of an association between screentime and television screentime with the  
44 metabolic syndrome. There is no clear evidence for an association with any individual cardiovascular  
45 risk factor.  
46  
47  
48  
49

#### 50 Fitness

51  
52 Associations with fitness were examined by 4 medium quality reviews. Two reviews, Costigan et al.  
53 and Tremblay et al., noted that evidence for an association between screentime and fitness was  
54 weak and inconsistent. Indeed, Costigan et al. noted that 2/5 studies reported a positive  
55 relationship, i.e. that higher screentime was associated with higher physical activity.  
56

57 In contrast, 2 reviews (Carson et al, and van Ekris et al.) concluded there was strong evidence for an  
58 inverse association between screentime or television screentime and cardiorespiratory fitness.  
59  
60

1  
2  
3 Carson et al. noted that 4/4 studies examined a threshold and found that higher screentime was  
4 significantly associated with lower fitness when a 2-h cut-point was used (4/4 studies).  
5

#### 6 *Summary*

7  
8 There is weak and inconsistent evidence for an association between screentime or television  
9 screentime and cardiorespiratory fitness, with weak evidence for a 2 hour daily screentime  
10 threshold.  
11

#### 12 13 14 Cognition, development and attainments

15  
16 Associations with CYP cognition and development were examined in 3 medium quality reviews.

17  
18 Le Blanc et al. reported that there was low quality evidence that television screentime had a  
19 negative impact on cognitive development in young children. Evidence was stronger amongst  
20 infants, where Le Blanc et al. concluded that there was moderate-quality evidence that television  
21 screentime elicited no benefits and was harmful to cognitive development.  
22

23  
24 Tremblay et al. reported there was poor evidence that greater television screentime was associated  
25 with poorer educational attainments. Carson et al. also noted weak evidence that screentime or  
26 television screentime were associated with poorer attainments.  
27

#### 28 *Summary*

29  
30 There is weak evidence that screentime particularly television screentime is associated with poorer  
31 educational attainments and has a negative effect on cognitive development in younger children.  
32

#### 33 34 35 Sleep

36  
37 Associations with sleep were examined in 1 medium and 2 low quality reviews.

38  
39 In a medium quality review, Costigan et al. reported a positive association between screentime and  
40 sleep problems in 2/2 studies. In low quality reviews, Duch et al. reported there was inconclusive  
41 evidence for an association between screentime and sleep duration. In contrast, Hale and Guan<sup>24</sup>  
42 reported there was moderate evidence that overall screentime, television screentime, computer  
43 screentime, video screentime and mobile phone screentime were associated with poor sleep  
44 outcomes including delayed bedtimes, shortened total sleeptime, sleep-onset-latency and daytime  
45 tiredness. They estimated that there was approximately 5-10 minute sleep bedtime delay with each  
46 additional hour of television screentime. Findings of significantly shorter total sleep time with  
47 greater mobile device screentime were reported in 10/12 studies, with 5/5 reporting greater  
48 subjective day-time tiredness or sleepiness.  
49

#### 50 51 *Summary*

52  
53 There is weak evidence that screentime is associated with poor sleep outcomes including delay in  
54 sleep onset, reduced total sleep time and daytime tiredness. There is evidence from 1 review that  
55 this association is seen across all forms of screentime including television screentime, computer  
56 screentime, video screentime and mobile phone screentime.  
57  
58  
59  
60

### Physical pain

Associations with pain were examined in 1 medium quality review. Costigan et al. reported that there was weak evidence for an association between screentime and neck/shoulder pain, headache and lower back pain although this was examined in very few studies. As this was examined in only one review we characterised the level of evidence as insufficient.

### Asthma

Associations with asthma were examined in 1 medium quality review. Van Ekris et al reported there was insufficient evidence for a relationship between screentime or television screentime and asthma prevalence.

## Discussion

This RoR summarizes the published literature on the effects of screentime on CYP health and wellbeing. Evidence was strongest for adiposity and diet outcomes, with moderately-strong evidence that higher television screentime was associated with greater obesity/adiposity and moderate evidence for an association between screentime, particularly television screentime, and higher energy intake and less healthy diet quality. Mental health and wellbeing were also the subject of a number of reviews. There was moderately-strong evidence for an association between screentime and depressive symptoms, although evidence for social media screentime and depression was weak. Evidence that screentime was associated with poorer quality of life was moderate, however evidence for an association of screentime with other mental health outcomes was weak, including for behaviour problems, anxiety, hyperactivity and inattention, poorer self-esteem, poorer wellbeing and poorer psychosocial health in young children. Weak evidence suggested that mental health associations appeared to be independent of physical activity.

Evidence for other outcomes was notably less strong. There is weak evidence of an association between screentime (and television screentime) with the metabolic syndrome, poorer cardiorespiratory fitness, poorer cognitive development and lower educational attainments and poor sleep outcomes. It is important to note that the weak evidence reported here largely relates to a lack of literature rather than weak associations. In contrast, there was no or insufficient evidence for an association of screentime with eating disorders or suicidal ideation, any individual cardiovascular risk factor, asthma prevalence or pain.

We identified no consistent evidence of benefits for health, wellbeing or development, although we acknowledge that screentime may be associated with benefits in other domains not assessed here.

Evidence for a dose-response relationship between screentime and health outcomes is generally weak. We found moderate evidence for a dose-response association for screentime or television screentime and adiposity outcomes, depression and HRQOL. However we identified no strong evidence for a threshold in hours of screentime for adiposity and only weak evidence for a threshold of  $\geq 2$  hours daily screentime for the associations with depressive symptoms and with HRQOL. One

1  
2  
3 review suggested there was a curvilinear relationship between screentime and depressive  
4 symptoms.<sup>21</sup>  
5

6 Overall the quality of included reviews was moderate, with only one high quality review and three  
7 low quality reviews included. There were only 4 meta-analyses identified, two of television  
8 screentime and BMI and one each of screentime and the metabolic syndrome and screentime and  
9 HRQOL. Almost all studies in each review were undertaken in high-income countries, the majority in  
10 each review undertaken in the USA. Overlap in included studies between reviews was generally low,  
11 suggesting that findings were not dominated by small numbers of individual studies.  
12  
13

14 A major weakness in the literature is its domination by television screentime, with smaller numbers  
15 of studies examining computer use or gaming and very few studies including mobile screen devices.  
16 None examined multiple concurrent screen use, although there is increasing evidence that CYP may  
17 combine screen-use such as using smartphones whilst watching television; young people report  
18 using multiple screens to facilitate filtering out of unwanted content, including advertisements.<sup>25</sup>  
19 Thus it is unclear to what extent these findings can be generalised to more modern forms of screen  
20 use including social media and mobile screen use. RoR are necessarily limited to including primary  
21 studies which have been included in systematic reviews and are thus necessarily limited in  
22 addressing very new developments. It may take some years before adequate research is available on  
23 modern digital screen use including social media and multiple screen use and their impacts upon  
24 health.  
25  
26  
27

28 A central issue in whether these findings are generalizable to other forms of screentime is the  
29 degree to which the effects of screentime relate to time spent on screen or content watched on  
30 screen – or even the context in which the content is watched on screens. Screentime may act  
31 through use whilst sedentary (i.e. displacing physical activity) or through more direct effects. These  
32 direct effects may be either through the content watched on screens (e.g. desensitizing children to  
33 violence or sexually explicit material; or exposure to bullying), through the displacement of  
34 socialisation or learning time (e.g. leading to social isolation) or through more direct cognitive  
35 effects, e.g. the impact of blue screen light on sleep patterns and impacts upon attention and  
36 concentration.<sup>4</sup> Our findings tell us little about the mechanisms by which screentime affects health,  
37 and it is plausible that the effects we identified on adiposity, fitness, cardiovascular risk, mental  
38 health and sleep are due to the sedentary effects of screen use. However we did identify moderate  
39 evidence that screentime was associated with higher intake of energy dense foods, which unlikely to  
40 be mediated by sedentariness. Further, there is weak evidence that associations of screentime with  
41 mental health outcomes are robust to adjustment for physical activity,<sup>21</sup> suggesting that screentime  
42 may affect mental health independently of the displacement of physical activity.  
43  
44  
45  
46

47 We found no convincing evidence of health benefits from screentime. Yet some argue strongly that  
48 digital media have potential significant health, social and cognitive benefits and that harms are over-  
49 stated. A prominent group of scientists recently argued that messages that screens are inherently  
50 harmful "is simply not supported by solid research and evidence. Furthermore, the concept of  
51 "screen time" itself is simplistic and arguably meaningless, and the focus on the amount of screen  
52 use is unhelpful."<sup>12</sup> They pointed out that research has focused upon counting the quantity of  
53 screentime rather than investigating the contexts of screen use and content watched. Others have  
54 pointed out similar limitations in the literature on screen use and violence<sup>7</sup> and that educational use  
55 of screens is promoted in many educational systems.<sup>13</sup> Our review addressed quantity of screentime  
56 and did not investigate the impacts of contexts or content on health outcomes. However findings of  
57 a curvilinear relationship between screentime and depressive symptoms in one of our reviews<sup>21</sup> and  
58  
59  
60



1  
2  
3 the description of a similar relationship for adolescent wellbeing<sup>26</sup> suggests that moderate use of  
4 digital technology might be important for social integration for adolescents in modern societies.  
5  
6  
7

### 8 Limitations

9  
10 Our review is subject to a number of limitations. Quality of included reviews was largely moderate or  
11 low, with only one high quality review. Key factors for reviews not being classified as high quality  
12 were failing to assess the quality and likelihood of publication bias within included primary studies or  
13 failing to specify an a priori design. The included reviews were not entirely independent, although the  
14 overlap in primary studies was low or very low for most, thus it is unlikely that our findings are  
15 biased by individual studies included in multiple reviews. Data were extracted by 1 researcher, and  
16 although data were checked carefully back to the publication by the second researcher, we did not  
17 use dual independent extraction. We did not attempt to contact the authors of articles we could not  
18 retrieve as this was a rapid review.  
19

20  
21 RoR are a methodology that is being developed and there is no agreed best practice; such reviews  
22 are only as good as the reviews included and the primary studies that are included within them.<sup>27</sup>  
23 There were limitations regarding the reviews included in our study in terms of heterogeneity  
24 between reviews in definition of screentime exposures, definition of health outcomes and  
25 measurement tools, making comparisons difficult. Screentime was largely measured by self-report  
26 although increasing numbers of studies over time used more objective measures of screentime.  
27 Reviews also largely failed to consider the processes by which screentime impacted upon health  
28 outcomes. In our narrative synthesis of findings, we aimed to avoid 'vote-counting' of numbers of  
29 positive or negative studies to judge strength of evidence. However it is possible that our findings  
30 reflect methodological or conceptual biases in our included reviews. A limitation of reviews or  
31 reviews including our own is the necessary time lag for inclusion of primary studies in systematic  
32 reviews, meaning that they may not represent the most contemporary research. Data on mobile  
33 screen use was particularly limited in our included reviews. Aside from reviews focusing on very  
34 young children, data from the included studies did not allow us to comment separately on findings  
35 by age group.  
36  
37  
38  
39

### 40 Conclusions

41  
42 There is considerable evidence that higher levels of screentime is associated with a variety of health  
43 harms for CYP, with evidence strongest for adiposity, unhealthy diet, depressive symptoms and  
44 quality of life. Evidence for impact upon other health outcomes is largely weak or absent. We found  
45 no consistent evidence of health benefits from screentime. Whilst evidence for a threshold to guide  
46 policy on CYP screentime exposure was very limited, there is weak evidence that small amounts of  
47 daily screen use is not harmful and may have some benefits.  
48  
49

50  
51 These data broadly support policy action to limit screen use by CYP because of evidence of health  
52 harms across a broad range of domains of physical and mental health. We did not identify a  
53 threshold for 'safe' screen use, although we note there was weak evidence for a threshold of  $\geq 2$   
54 hours daily screentime for the associations with depressive symptoms and with HRQOL. We did not  
55 identify evidence supporting differential thresholds for younger children or adolescents.  
56  
57

58 Any potential limits on screentime must be considered in the light of a lack of understanding of the  
59 impact of the content or contexts of digital screen use. Given the rapid increase in screen use by CYP  
60

1  
2  
3 internationally over the past decade, particularly for new content areas such as social media, further  
4 research is urgently needed to understand the impact of the contexts and content of screen use on  
5 CYP health and wellbeing, particularly in relationship to mobile digital devices.  
6  
7  
8  
9  
10  
11  
12  
13  
14  
15  
16  
17  
18  
19  
20  
21  
22  
23  
24  
25  
26  
27  
28  
29  
30  
31  
32  
33  
34  
35  
36  
37  
38  
39  
40  
41  
42  
43  
44  
45  
46  
47  
48  
49  
50  
51  
52  
53  
54  
55  
56  
57  
58  
59  
60

For peer review only



**Funding**

This research received no specific grant from any funding agency in the public, commercial or not-for-profit sectors.

**Competing interests**

All authors declare they have no competing interests.

**Author contributions**

RV conceptualised the study, planned the methods, assisted with the extraction of data and analysis of findings led writing the paper. NS undertook the initial search and led the extraction of data and contributed to analysis of findings and writing the paper.

**Data sharing statement**

All data in this paper were obtained from published studies. No additional data are available from the authors.

1  
2  
3 *Figure 1. Flowchart for review*  
4  
5  
6  
7  
8  
9  
10  
11  
12  
13  
14  
15  
16  
17  
18  
19  
20  
21  
22  
23  
24  
25  
26  
27  
28  
29  
30  
31  
32  
33  
34  
35  
36  
37  
38  
39  
40  
41  
42  
43  
44  
45  
46  
47  
48  
49  
50  
51  
52  
53  
54  
55  
56  
57  
58  
59  
60

For peer review only

1  
2  
3  
4  
5  
6  
7  
8  
9  
10  
11  
12  
13  
14  
15  
16  
17  
18  
19  
20  
21  
22  
23  
24  
25  
26  
27  
28  
29  
30  
31  
32  
33  
34  
35  
36  
37  
38  
39  
40  
41  
42  
43  
44  
45  
46

Table 1. Characteristics of included studies

| Author                    | Age               | Outcome measures                                                                                                                                                   | Meta-analysis | Studies (n, CS, LS, RCT, N of subjects)                                               | % duplicate studies | Narrative findings                                                                                                                                                                                                                                                                                                                                                                                                              | Findings of meta-analysis                                                                                                                                                                |
|---------------------------|-------------------|--------------------------------------------------------------------------------------------------------------------------------------------------------------------|---------------|---------------------------------------------------------------------------------------|---------------------|---------------------------------------------------------------------------------------------------------------------------------------------------------------------------------------------------------------------------------------------------------------------------------------------------------------------------------------------------------------------------------------------------------------------------------|------------------------------------------------------------------------------------------------------------------------------------------------------------------------------------------|
| Pearson and Biddle (2011) | C< 11y; A: 12–18y | Dietary intake; assessed largely through food frequency questionnaires.                                                                                            | No            | n=53; 19 in C and 26 in Ad; largely CS; 5 LS in C & 5 LS in Ad. Total N not reported. | 14.6%               | C (<12yrs): TVST - assoc. with fruit, vegetable consumption; + assoc. with energy-dense snack consumption, fast food consumption, energy-dense drinks, total energy intake, percentage energy from fat.<br>Ad: ST – assoc. with fruit, vegetable, FV, fibre consumption; + assoc. energy-dense snack, fast food, fried food consumption, energy dense drink, total energy intake, percentage energy from fat, total fat.        | C: strengths of assoc. were mainly small to moderate (no exact values given);<br>Ad: strength of assoc. was small to moderate for energy-dense drinks and snacks (no exact values given) |
| LeBlanc et al. (2012)     | 0–4y              | Adiposity (n=11), psychosocial health (n=6), cognitive development (n=8 studies). No studies identified of bone mass, motor development or cardio metabolic health | No            | n=23<br>N= 22,417                                                                     | 13.0%               | Infants: TVST elicited no benefits and may be harmful to cognitive development; increased TVST assoc. with unfavourable adiposity.<br>Toddlers: TVST has - impact on adiposity, cognitive development, - affected psychosocial health<br>Pre-schoolers: TVST - impact on adiposity; evidence between increased TV and decreases scores on measures of psychosocial health; - relationship between TVV and cognitive development |                                                                                                                                                                                          |
| Costigan et al. (2013)    | 12-18y            | Physical, psychosocial, and/or behavioural health outcomes                                                                                                         | No            | n=33; 25 CS, 8 LS.                                                                    | 21.2%               | ST + assoc. with weight status, neck/shoulder/lower back pain, backache/headache, sleep problems and depressive symptoms;<br>- assoc. with perceived health and healthy dietary behaviour.                                                                                                                                                                                                                                      |                                                                                                                                                                                          |

| Author                  | Age   | Outcome measures                                                                                                                                                | Meta-analysis | Studies (n, CS, LS, RCT, N of subjects)                                                                                                      | % duplicate studies | Narrative findings                                                                                                                                                                                                                                                                                                                                                                                                                                                                                                                                                 | Findings of meta-analysis                                                                                                                                                                                                                                                                                                |
|-------------------------|-------|-----------------------------------------------------------------------------------------------------------------------------------------------------------------|---------------|----------------------------------------------------------------------------------------------------------------------------------------------|---------------------|--------------------------------------------------------------------------------------------------------------------------------------------------------------------------------------------------------------------------------------------------------------------------------------------------------------------------------------------------------------------------------------------------------------------------------------------------------------------------------------------------------------------------------------------------------------------|--------------------------------------------------------------------------------------------------------------------------------------------------------------------------------------------------------------------------------------------------------------------------------------------------------------------------|
| Tremblay et al. (2012)  | 5–17y | Body composition, physical fitness, metabolic syndrome, cardiovascular risk, self-esteem, pro-social behaviour, academic performance                            | Yes           | n=232; 8 RCTs, 10 intervention studies, 37 LS & 177 CS. N= 983,840                                                                           | 2.2%                | +assoc. between adiposity and TVST; assoc. between ST and higher cholesterol and blood pressure, HbA1c and insulin insensitivity;<br><br>- relationship between ST and self-esteem;<br><br>>2 hours/day ST assoc. with lower cardiorespiratory fitness.                                                                                                                                                                                                                                                                                                            | TVST and BMI was the only area where data allowed meta-analysis; 4 RCTs included in the meta-analysis: Decreased TVST assoc. with decrease in BMI (-0.89kg/m <sup>2</sup> (95% CI of -1.467 to -0.11, p = 0.01)                                                                                                          |
| Suchert et al. (2015)   | 5-18y | Depressive symptoms, anxiety symptoms, internalizing problems, self-esteem, eating disorder symptoms, hyperactivity and inattention problems, wellbeing and QoL | No            | n=91; 73 CS, 16 LS, 2 RCT. N not reported.                                                                                                   | 7.7%                | + assoc. between ST and hyperactivity/inattention problems, internalizing problems, poorer psychological wellbeing and perceived QoL. Indeterminate assoc. between SBB and depressive and anxiety symptoms, self-esteem and eating disorder symptoms.                                                                                                                                                                                                                                                                                                              |                                                                                                                                                                                                                                                                                                                          |
| van Ekris et al. (2016) | < 18y | Anthropometrics, cardiometabolic risk, blood pressure, fitness, other biomedical health indicators                                                              | Yes           | n=109; N=24,257 for MA of TVV and BMI from 9 prospective cohorts. N=6971 for MA of computer screen viewing & BMI from 5 prospective cohorts. | 5.2%                | + relationship between TVST and overweight/obesity incidence and overweight/obesity incidence; NoE for relationship between computer use/game time with BMI/BMI z score or WC/WC z-score; + relationship between ST and BMI/BMI z-score and overweight/obesity.<br><br>NoE for relationship between ST and triglycerides and glucose, LDL-cholesterol, ratio of total cholesterol to HDL cholesterol and systolic and diastolic blood pressure; - relationship between TVST and cardiorespiratory fitness/VO <sub>2</sub> max ; InE with strength and being unfit, | MA: BMI at follow-up was not significantly associated with each additional hour of TV viewing ( $\beta = 0.01$ , 95%CI = [-0.002; 0.02]) or computer use ( $\beta = 0.00$ , 95%CI = [-0.004; 0.01]) per day, with high heterogeneity in each analysis. Adjustment for physical activity or diet did not change findings. |

1  
2  
3  
4  
5  
6  
7  
8  
9  
10  
11  
12  
13  
14  
15  
16  
17  
18  
19  
20  
21  
22  
23  
24  
25  
26  
27  
28  
29  
30  
31  
32  
33  
34  
35  
36  
37  
38  
39  
40  
41  
42  
43  
44  
45  
46

| Author               | Age    | Outcome measures                                                                                                                                              | Meta-analysis | Studies (n, CS, LS, RCT, N of subjects)                                                                      | % duplicate studies | Narrative findings                                                                                                                                                                                                                                                             | Findings of meta-analysis |
|----------------------|--------|---------------------------------------------------------------------------------------------------------------------------------------------------------------|---------------|--------------------------------------------------------------------------------------------------------------|---------------------|--------------------------------------------------------------------------------------------------------------------------------------------------------------------------------------------------------------------------------------------------------------------------------|---------------------------|
|                      |        |                                                                                                                                                               |               |                                                                                                              |                     | cardiorespiratory fitness/VO2max and metabolic risk z- scores, asthma and bone mass indicators.                                                                                                                                                                                |                           |
| Carson et al. (2016) | 5-17y  | Body composition, Metabolic syndrome/cardiovascular disease risk factors, academic achievement, fitness, self-esteem                                          | No            | n=235; 1 RCT, 1 cross-over trial, 49 LS, 5 CC and 179 CS. 35 used accelerometer measures of SB. N not stated | 3.5%                | Higher ST assoc. with unfavourable body composition, overweight/obese and with clustered risk factor score and lower cardiorespiratory fitness, unfavourable measures of behaviour, lower self-esteem (TVST); inconsistent findings for assoc. with lower academic attainment. |                           |
| Hoare et al (2016)   | 10-19y | Depressive symptomatology, anxiety symptomatology, self-esteem, suicide ideation, other mental health indicators                                              | No            | n=32; 1 RCT, 6 LS, 24 CS                                                                                     | 21.9%               | + relationship between ST and depressive symptomatology, psychological distress and ST duration and severity of anxiety symptoms. + relationship between low self-esteem and screen time. InE for relationship between ST and suicidal ideation.                               |                           |
| Duch et al. (2013)   | < 3y   | biological and demographic factors, family biological and demographic factors, family structure factors, behavioral factors, structural environmental factors | No            | n=29; 18 CS, 10 LS, 1 RCT. N not stated                                                                      | 3.5%                | + assoc. between ST and age and BMI. InE on ST and sleep duration and crying duration.                                                                                                                                                                                         |                           |
| Marsh et al. (2013)  | 5-24y  | Energy intake measured objectively in experimental studies using an experimental meal during 2 exposure scenarios                                             | No            | n=10; 8 RCT and 2 quasi-experimental studies                                                                 | 0                   | ST (in the absence of food advertising) assoc. with increased dietary intake; TVST increases intake of very palpable energy-dense foods; stimulatory effects of TVST on intake were stronger in overweight/obese c than those of normal weight                                 |                           |

| Author                        | Age    | Outcome measures                       | Meta-analysis                                         | Studies (n, CS, LS, RCT, N of subjects)                 | % duplicate studies | Narrative findings                                                                                                                                                                                                                                                                                          | Findings of meta-analysis                                                                                                                                                                                                                                                                                                                                                                                                                                                                         |
|-------------------------------|--------|----------------------------------------|-------------------------------------------------------|---------------------------------------------------------|---------------------|-------------------------------------------------------------------------------------------------------------------------------------------------------------------------------------------------------------------------------------------------------------------------------------------------------------|---------------------------------------------------------------------------------------------------------------------------------------------------------------------------------------------------------------------------------------------------------------------------------------------------------------------------------------------------------------------------------------------------------------------------------------------------------------------------------------------------|
| Hale and Guan (2015)          | 5-17y  | Sleep outcomes                         | No                                                    | n=67; 3 RCT.                                            | 0                   | Assoc. with at least one of the sleep outcomes (delayed bedtime, shortened total sleep time, daytime tiredness, sleep onset latency) was found for computer use, video gaming, mobile device, unspecified ST.                                                                                               |                                                                                                                                                                                                                                                                                                                                                                                                                                                                                                   |
| de Oliveira and Guedes (2016) | 10-19y | Metabolic Syndrome (MetS)              | Yes. ST dichotomised as <=2hrs v. >2hrs for analyses. | n=21 - 9 examined ST. 8 CS, 1 CC. N=8680                | 0                   | Inconclusive evidence for the assoc. of ST or TVST with presence of the MetS.                                                                                                                                                                                                                               | Significant assoc. was not identified between ST and MetS; OR for MetS in relation to >2hrs ST = 1.20 (CI 95%, 0.91 to 1.59) p = 0.20, n = 3,881, studies = 6, I2 = 37%).<br><br>Subgroup analysis: no significant assoc. between ST and MetS through the whole week (OR = 1.03 (CI 95%, 0.75 to 1.42) p = 0.84, n = 2,261, studies = 4, I2 = 24%) however there was a significant assoc. between weekend ST and MetS (OR = 2.05 (CI 95%, 1.13 to 3.73) p = 0.02, n = 1,620 studies = 2, I2 = 0%) |
| Wu et al. (2017)              | 3-18y  | Health-related quality of life (HRQOL) | Yes. ST dichotomised as <2-2.4hrs v. ≥2-2.5hrs        | n=31, 17 examined ST. 13 CS, 1LS. Total N not reported. |                     | - assoc of ST with with HRQOL, consistent across television, computer and video screentime and across CSS and LS. 1 IS reported a dose-response relationship between screentime and HRQOL. HRQOL was lower across physical, mental and psychosocial health, school functioning, and general health domains. | Significant assoc. Between higher screentime and lower HRQOL: >2-2.5hrs/day ST associated with fall in HRQOL by 2.71 (1.59, 3.38; studies=2).                                                                                                                                                                                                                                                                                                                                                     |

1  
2  
3  
4  
5  
6  
7  
8  
9  
10  
11  
12  
13  
14  
15  
16  
17  
18  
19  
20  
21  
22  
23  
24  
25  
26  
27  
28  
29  
30  
31  
32  
33  
34  
35  
36  
37  
38  
39  
40  
41  
42  
43  
44  
45  
46

Table notes:

+ or – used for direction of association of screentime (ST) with health outcomes.

n refers to studies whilst N refers to total number of participants across the reviews.

% duplicate studies refers to the proportion of studies within a review that were included in any other included review

Table abbreviations

- assoc. associated with
- Ad adolescent
- C child
- CC case-control study
- CS cross-sectional study
- FV fruit and vegetable
- MA meta-analysis
- NoE no evidence
- LS longitudinal study
- QOL quality of life
- ST screentime
- TST total sleep time
- TVST television screentime

For peer review only

Table 2. Quality assessment for included reviews

|                                      | Provides <i>a priori</i> design | Duplicate data extraction | Search $\geq 2$ databases plus another mode of searching | Searched for reports regardless of their publication types | Included a list of included studies | Reports characteristics of individual studies | Assesses quality of studies | Uses the scientific quality of the studies appropriately | Uses appropriate methods to combine the findings of studies | Assessed likelihood of publication bias | Includes conflict of interest statement | Overall quality rating |
|--------------------------------------|---------------------------------|---------------------------|----------------------------------------------------------|------------------------------------------------------------|-------------------------------------|-----------------------------------------------|-----------------------------|----------------------------------------------------------|-------------------------------------------------------------|-----------------------------------------|-----------------------------------------|------------------------|
| Pearson & Biddle                     | N                               | Y                         | N                                                        | N                                                          | Y                                   | N                                             | Y                           | Y                                                        | Y                                                           | N                                       | Y                                       | low                    |
| Hale and Guan                        | N                               | N                         | Y                                                        | N                                                          | Y                                   | N                                             | N                           | N                                                        | Y                                                           | N                                       | Y                                       | low                    |
| Marsh et al.                         | N                               | N                         | Y                                                        | Y                                                          | Y                                   | Y                                             | Y                           | Y                                                        | Y                                                           | N                                       | N                                       | medium                 |
| Costigan et al.                      | N                               | N                         | Y                                                        | N                                                          | Y                                   | Y                                             | Y                           | Y                                                        | Y                                                           | N                                       | Y                                       | medium                 |
| Dutch et al.                         | N                               | Y                         | Y                                                        | N                                                          | N                                   | Y                                             | N                           | N                                                        | Y                                                           | N                                       | Y                                       | low                    |
| Goncalves de Oliveira & Pinto Guedes | Y                               | Y                         | Y                                                        | N                                                          | Y                                   | Y                                             | Y                           | Y                                                        | Y                                                           | Y                                       | Y                                       | high                   |
| Hoare et al.                         | N                               | Y                         | Y                                                        | N                                                          | Y                                   | Y                                             | Y                           | Y                                                        | Y                                                           | N                                       | Y                                       | medium                 |
| Carson et al.                        | Y                               | Y                         | Y                                                        | N                                                          | Y                                   | Y                                             | Y                           | Y                                                        | Y                                                           | N                                       | Y                                       | medium                 |
| LeBlanc et al.                       | Y                               | Y                         | Y                                                        | N                                                          | Y                                   | Y                                             | Y                           | Y                                                        | Y                                                           | N                                       | Y                                       | medium                 |
| Tremblay et al.                      | N                               | Y                         | Y                                                        | Y                                                          | Y                                   | Y                                             | Y                           | Y                                                        | Y                                                           | N                                       | Y                                       | medium                 |
| van Ekris et al.                     | N                               | Y                         | Y                                                        | N                                                          | Y                                   | Y                                             | Y                           | Y                                                        | Y                                                           | N                                       | Y                                       | medium                 |
| Suchert et al.                       | N                               | N                         | Y                                                        | N                                                          | Y                                   | Y                                             | Y                           | Y                                                        | Y                                                           | N                                       | Y                                       | medium                 |
| Wu et al.                            | N                               | Y                         | Y                                                        | Y                                                          | Y                                   | Y                                             | Y                           | Y                                                        | Y                                                           | Y                                       | N                                       | medium                 |



1  
2  
3  
4  
5  
6  
7  
8  
9  
10  
11  
12  
13  
14  
15  
16  
17  
18  
19  
20  
21  
22  
23  
24  
25  
26  
27  
28  
29  
30  
31  
32  
33  
34  
35  
36  
37  
38  
39  
40  
41  
42  
43  
44  
45  
46

Table 3. Mapping of reviews to subject area by quality

|                                                  | High quality reviews                 | Medium quality reviews                                                                                                | Low quality reviews        |
|--------------------------------------------------|--------------------------------------|-----------------------------------------------------------------------------------------------------------------------|----------------------------|
| Body composition including obesity               |                                      | Le Blanc et al.<br>Costigan et al.<br>Tremblay et al.<br>van Ekris et al.<br>Carson et al.                            | Duch et al.                |
| Diet and energy intake                           |                                      | Costigan et al.<br>Marsh et al.                                                                                       | Pearson & Biddle           |
| Mental health outcomes including quality of life |                                      | Le Blanc et al.<br>Costigan et al.<br>Tremblay et al.<br>Suchert et al.<br>Carson et al.<br>Hoare et al.<br>Wu et al. |                            |
| Cardiovascular risk                              | Goncalves de Oliveira & Pinto Guedes | Tremblay et al.<br>van Ekris et al.<br>Carson et al.                                                                  |                            |
| Fitness                                          |                                      | Costigan et al.<br>Tremblay et al.<br>van Ekris et al.<br>Carson et al.                                               |                            |
| Cognition, development and attainments           |                                      | Le Blanc et al.<br>Tremblay et al.<br>Carson et al.                                                                   |                            |
| Sleep                                            |                                      | Costigan et al.                                                                                                       | Duch et al.<br>Hale & Guan |

## References

1. Marsh S, Ni Mhurchu C, Maddison R. The non-advertising effects of screen-based sedentary activities on acute eating behaviours in children, adolescents, and young adults. A systematic review. *Appetite* 2013;71(1):259-73. doi: 10.1016/j.appet.2013.08.017
2. Iannotti RJ, Janssen I, Haug E, et al. Interrelationships of adolescent physical activity, screen-based sedentary behaviour, and social and psychological health. *International journal of public health* 2009;54 Suppl 2:191-8. doi: 10.1007/s00038-009-5410-z
3. Klesges RC, Shelton ML, Klesges LM. Effects of television on metabolic rate: potential implications for childhood obesity. *Pediatrics* 1993;91(2):281-86.
4. Domingues-Montanari S. Clinical and psychological effects of excessive screen time on children. *J Paediatr Child Health* 2017;53(4):333-38. doi: 10.1111/jpc.13462
5. Reid Chassiakos YL, Radesky J, Christakis D, et al. Children and Adolescents and Digital Media. *Pediatrics* 2016;138(5) doi: 10.1542/peds.2016-2593
6. Canadian Paediatric Society DHTFOO. Screen time and young children: Promoting health and development in a digital world. *Paediatr Child Health* 2017;22(8):461-77. doi: 10.1093/pch/pxx123 [published Online First: 2018/03/31]
7. Ferguson CJ, Beresin E. Social science's curious war with pop culture and how it was lost: The media violence debate and the risks it holds for social science. *Prev Med* 2017;99:69-76. doi: 10.1016/j.ypmed.2017.02.009 [published Online First: 2017/02/19]
8. Costigan SA, Bennett L, Plotnikoff RC, et al. The Health Indicators Associated With Screen-Based Sedentary Behaviour Among Adolescent Girls: A Systematic Review. *Journal of Adolescent Health* 2013;52(4):382-92.
9. Duch H, Fisher EM, Ensari I, et al. Screen time use in children under 3 years old: a systematic review of correlates. *International Journal of Behavioral Nutrition and Physical Activity* 2013;10(102)
10. Tremblay MS, LeBlanc AG, Kho ME, et al. Systematic review of sedentary behaviour and health indicators in school-aged children and youth. *International Journal of Behavioral Nutrition and Physical Activity* 2011;8(98)
11. van Ekris E, Altenburg TM, Singh AS, et al. An evidence-update on the prospective relationship between childhood sedentary behaviour and biomedical health indicators: a systematic review and meta-analysis. *Obesity reviews* 2016;17(9):833-49.
12. Peter Etchells on behalf of all signatories. Open letter: There is an important debate to be had about screen time, but we need quality research and evidence to support it. Guardian. London, 2016.
13. Straker L, Zabatiero J, Danby S, et al. Conflicting Guidelines on Young Children's Screen Time and Use of Digital Technology Create Policy and Practice Dilemmas. *J Pediatr* 2018 doi: 10.1016/j.jpeds.2018.07.019 [published Online First: 2018/08/25]
14. Liberati A, Altman DG, Tetzlaff J, et al. The PRISMA statement for reporting systematic reviews and meta-analyses of studies that evaluate healthcare interventions: explanation and elaboration. *BMJ* 2009;339:b2700. doi: 10.1136/bmj.b2700 [published Online First: 2009/07/23]
15. Shackleton N, Jamal F, Viner R, et al. Systematic review of reviews of observational studies of school-level effects on sexual health, violence and substance use. *Health Place* 2016;39:168-76. doi: 10.1016/j.healthplace.2016.04.002
16. Caird J, Sutcliffe K, Kwan I, et al. Mediating policy-relevant evidence at speed: are systematic reviews of systematic reviews a useful approach? *Evidence and Policy* 2014:ISSN 1744-2648

17. Carson V, Hunter S, Kuzik N, et al. Systematic review of sedentary behaviour and health indicators in school-aged children and youth: an update. *Applied Physiology, Nutrition, and Metabolism* 2016;41(6):S240-65.
18. LeBlanc AG, Spence JC, Carson V, et al. Systematic review of sedentary behaviour and health indicators in the early years (aged 0-4 years). *Applied Physiology, Nutrition, and Metabolism* 2012;37(4):753-72.
19. Pearson N, Biddle SJH. Sedentary Behaviour and Dietary Intake in Children, Adolescent, and Adults. *American Journal of Preventive Medicine* 2011;41(2):178-88.
20. Hoare E, Milton K, Foster C, et al. The associations between sedentary behaviour and mental health among adolescents: a systematic review. *International Journal of Behavioral Nutrition and Physical Activity* 2016;13(108)
21. Suchert V, Hanewinkel R, Isensee B. Sedentary behavior and indicators of mental health in school-aged children and adolescents: A systematic review. *Preventive Medicine* 2015;76:48-57.
22. Wu XY, Han LH, Zhang JH, et al. The influence of physical activity, sedentary behavior on health-related quality of life among the general population of children and adolescents: A systematic review. *PLoS one* 2017;12(11):e0187668. doi: 10.1371/journal.pone.0187668 [published Online First: 2017/11/10]
23. Goncalves de Oliveira R, Pinto Guedes D. Physical Activity, Sedentary Behavior, Cardiorespiratory Fitness and Metabolic Syndrome in Adolescents: Systematic Review and Meta-Analysis of Observational Evidence. *PLoS One* 2016;11(12):1-24.
24. Hale L, Guan S. Screen time and sleep among school-aged children and adolescents: A systematic review *Sleep Medicine reviews* 2015;21:50-58.
25. Jago R, Sebire SJ, Gorely T, et al. "I'm on it 24/7 at the moment": a qualitative examination of multi-screen viewing behaviours among UK 10-11 year olds. *Int J Behav Nutr Phys Act* 2011;8:85. doi: 10.1186/1479-5868-8-85 [published Online First: 2011/08/05]
26. Przybylski AK, Weinstein N. A Large-Scale Test of the Goldilocks Hypothesis. *Psychol Sci* 2017;28(2):204-15. doi: 10.1177/0956797616678438
27. Thomson D, Russell K, Becker L, et al. The evolution of a new publication type: steps and challenges of producing overviews of reviews. *Research Synthesis Methods* 2010;1:198-211.

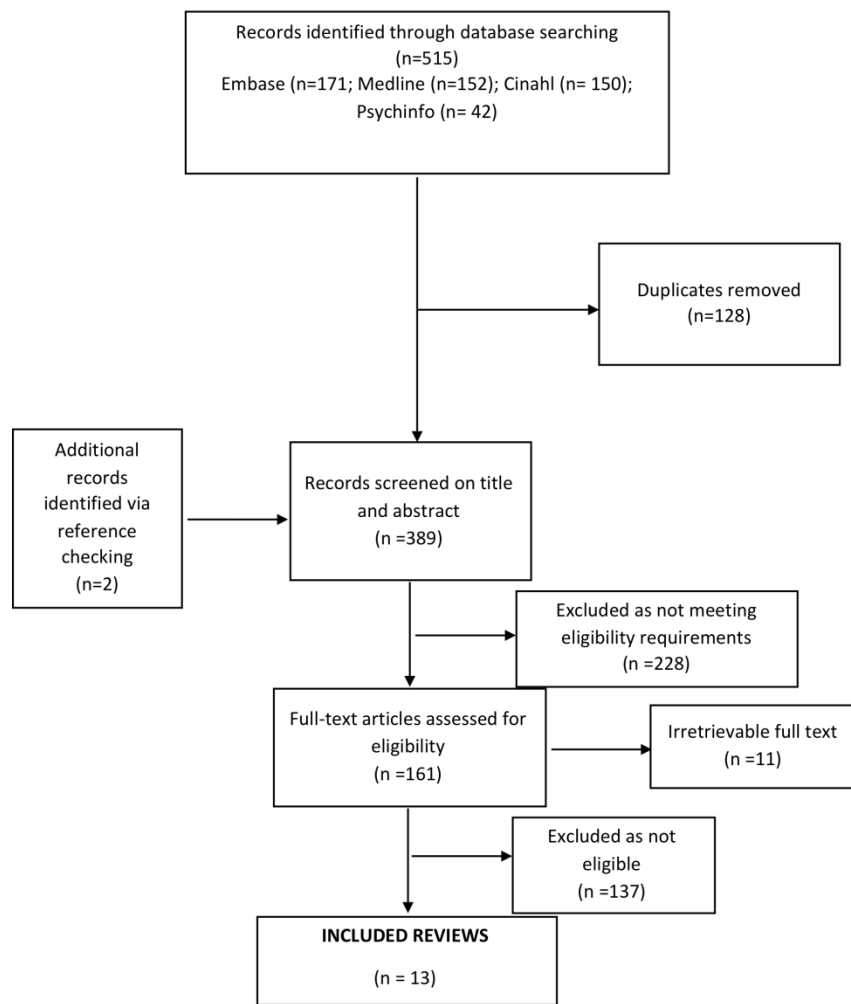

Figure 1. Study flow chart

165x230mm (300 x 300 DPI)



# PRISMA 2009 Checklist

| Section/topic                      | #  | Checklist item                                                                                                                                                                                                                                                                                              | Reported on page #           |
|------------------------------------|----|-------------------------------------------------------------------------------------------------------------------------------------------------------------------------------------------------------------------------------------------------------------------------------------------------------------|------------------------------|
| <b>TITLE</b>                       |    |                                                                                                                                                                                                                                                                                                             |                              |
| Title                              | 1  | Identify the report as a systematic review, meta-analysis, or both.                                                                                                                                                                                                                                         | 1                            |
| <b>ABSTRACT</b>                    |    |                                                                                                                                                                                                                                                                                                             |                              |
| Structured summary                 | 2  | Provide a structured summary including, as applicable: background; objectives; data sources; study eligibility criteria, participants, and interventions; study appraisal and synthesis methods; results; limitations; conclusions and implications of key findings; systematic review registration number. | 2                            |
| <b>INTRODUCTION</b>                |    |                                                                                                                                                                                                                                                                                                             |                              |
| Rationale                          | 3  | Describe the rationale for the review in the context of what is already known.                                                                                                                                                                                                                              | 4                            |
| Objectives                         | 4  | Provide an explicit statement of questions being addressed with reference to participants, interventions, comparisons, outcomes, and study design (PICOS).                                                                                                                                                  | 5                            |
| <b>METHODS</b>                     |    |                                                                                                                                                                                                                                                                                                             |                              |
| Protocol and registration          | 5  | Indicate if a review protocol exists, if and where it can be accessed (e.g., Web address), and, if available, provide registration information including registration number.                                                                                                                               | Registered Prospero database |
| Eligibility criteria               | 6  | Specify study characteristics (e.g., PICOS, length of follow-up) and report characteristics (e.g., years considered, language, publication status) used as criteria for eligibility, giving rationale.                                                                                                      | 5                            |
| Information sources                | 7  | Describe all information sources (e.g., databases with dates of coverage, contact with study authors to identify additional studies) in the search and date last searched.                                                                                                                                  | 5                            |
| Search                             | 8  | Present full electronic search strategy for at least one database, including any limits used, such that it could be repeated.                                                                                                                                                                               | 5                            |
| Study selection                    | 9  | State the process for selecting studies (i.e., screening, eligibility, included in systematic review, and, if applicable, included in the meta-analysis).                                                                                                                                                   | 5                            |
| Data collection process            | 10 | Describe method of data extraction from reports (e.g., piloted forms, independently, in duplicate) and any processes for obtaining and confirming data from investigators.                                                                                                                                  | 5                            |
| Data items                         | 11 | List and define all variables for which data were sought (e.g., PICOS, funding sources) and any assumptions and simplifications made.                                                                                                                                                                       | N/A                          |
| Risk of bias in individual studies | 12 | Describe methods used for assessing risk of bias of individual studies (including specification of whether this was done at the study or outcome level), and how this information is to be used in any data synthesis.                                                                                      | 6                            |
| Summary measures                   | 13 | State the principal summary measures (e.g., risk ratio, difference in means).                                                                                                                                                                                                                               | N/A                          |



# PRISMA 2009 Checklist

|                      |    |                                                                                                                                                           |   |
|----------------------|----|-----------------------------------------------------------------------------------------------------------------------------------------------------------|---|
| Synthesis of results | 14 | Describe the methods of handling data and combining results of studies, if done, including measures of consistency (e.g., $I^2$ ) for each meta-analysis. | 6 |
|----------------------|----|-----------------------------------------------------------------------------------------------------------------------------------------------------------|---|

Page 1 of 2

| Section/topic                 | #  | Checklist item                                                                                                                                                                                           | Reported on page # |
|-------------------------------|----|----------------------------------------------------------------------------------------------------------------------------------------------------------------------------------------------------------|--------------------|
| Risk of bias across studies   | 15 | Specify any assessment of risk of bias that may affect the cumulative evidence (e.g., publication bias, selective reporting within studies).                                                             | 6                  |
| Additional analyses           | 16 | Describe methods of additional analyses (e.g., sensitivity or subgroup analyses, meta-regression), if done, indicating which were pre-specified.                                                         | N/A                |
| <b>RESULTS</b>                |    |                                                                                                                                                                                                          |                    |
| Study selection               | 17 | Give numbers of studies screened, assessed for eligibility, and included in the review, with reasons for exclusions at each stage, ideally with a flow diagram.                                          | 7 & Figure 1       |
| Study characteristics         | 18 | For each study, present characteristics for which data were extracted (e.g., study size, PICOS, follow-up period) and provide the citations.                                                             | Table 1            |
| Risk of bias within studies   | 19 | Present data on risk of bias of each study and, if available, any outcome level assessment (see item 12).                                                                                                | Table 2 p23        |
| Results of individual studies | 20 | For all outcomes considered (benefits or harms), present, for each study: (a) simple summary data for each intervention group (b) effect estimates and confidence intervals, ideally with a forest plot. | N/A                |
| Synthesis of results          | 21 | Present results of each meta-analysis done, including confidence intervals and measures of consistency.                                                                                                  | 7-13               |
| Risk of bias across studies   | 22 | Present results of any assessment of risk of bias across studies (see Item 15).                                                                                                                          | N/A                |
| Additional analysis           | 23 | Give results of additional analyses, if done (e.g., sensitivity or subgroup analyses, meta-regression [see Item 16]).                                                                                    | N/A                |
| <b>DISCUSSION</b>             |    |                                                                                                                                                                                                          |                    |
| Summary of evidence           | 24 | Summarize the main findings including the strength of evidence for each main outcome; consider their relevance to key groups (e.g., healthcare providers, users, and policy makers).                     | 13                 |
| Limitations                   | 25 | Discuss limitations at study and outcome level (e.g., risk of bias), and at review-level (e.g., incomplete retrieval of identified research, reporting bias).                                            | 14-15              |
| Conclusions                   | 26 | Provide a general interpretation of the results in the context of other evidence, and implications for future research.                                                                                  | 15                 |
| <b>FUNDING</b>                |    |                                                                                                                                                                                                          |                    |
| Funding                       | 27 | Describe sources of funding for the systematic review and other support (e.g., supply of data); role of funders for the systematic review.                                                               | 16                 |

For peer review only - <http://bmjopen.bmj.com/site/about/guidelines.xhtml>

From: Moher D, Liberati A, Tetzlaff J, Altman DG, The PRISMA Group (2009). Preferred Reporting Items for Systematic Reviews and Meta-Analyses: The PRISMA Statement. PLoS Med 6(7): e1000097.

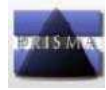

# PRISMA 2009 Checklist

1  
2  
3  
4  
5  
6  
7  
8  
9  
10  
11  
12  
13  
14  
15  
16  
17  
18  
19  
20  
21  
22  
23  
24  
25  
26  
27  
28  
29  
30  
31  
32  
33  
34  
35  
36  
37  
38  
39  
40  
41  
42  
43  
44  
45  
46  
47

doi:10.1371/journal.pmed1000097

For more information, visit: [www.prisma-statement.org](http://www.prisma-statement.org).

Page 2 of 2

For peer review only
